# Supplementary material
Source: PubMed Central journal article supplement (PMC4667779)

## Supporting Information for

### Reaction Intermediate Analogues as Bisubstrate Inhibitors of Pantothenate Synthetase

| Content                                                                       | Page            |
|-------------------------------------------------------------------------------|-----------------|
| HPLC Purity of Inhibitors                                                     | S1              |
| Spectrum data for <b>7-9, 11, 1,13-16,2,17-21,3, 23,4, 26-32</b> and <b>5</b> | S1– S5          |
| <sup>1</sup> H NMR <sup>13</sup> C NMR and MS of <b>7-9</b>                   | S6– S10         |
| <sup>1</sup> H NMR <sup>13</sup> C NMR and MS of <b>1, 13-15</b>              | S11-17          |
| <sup>1</sup> H NMR <sup>13</sup> C NMR and HRMS of <b>2</b>                   | S18 – S19       |
| <sup>1</sup> H NMR <sup>13</sup> C NMR and MS of <b>17-20, 3</b>              | S19 – S26       |
| <sup>1</sup> H NMR <sup>13</sup> C NMR and MS of <b>4</b>                     | S27 – S28       |
| <sup>1</sup> H NMR <sup>13</sup> C NMR and MS of <b>26-31</b>                 | S28 – S35       |
| <sup>1</sup> H NMR <sup>13</sup> C NMR and HRMS of <b>5</b>                   | S36 – S37       |
| MS of <b>11, 16, 21, 23, 32</b>                                               | S10,16,24,26,35 |

**HPLC Purity of Inhibitors.** HPLC purity was determined for all final target inhibitors **1-5**. For inhibitors **1-5**, two separate reverse-phase HPLC conditions were performed. A Varian Pursuit C18 column (4.6 × 150 mm, 5µm particle size) with detection at 254 nm and the indicated HPLC conditions (Solvent A = H<sub>2</sub>O, Solvent B = MeCN, flow rate = 1 mL/min, Methods A: 0-20 min: gradient 10%-95% B; isocratic 20-30 min: 95% B) as described below was employed to determine the purity of inhibitors. The purity of **1-5** was above 95%.

#### Spectrum data

**7** (colorless oil): <sup>1</sup>H NMR (400 MHz, CDCl<sub>3</sub>) δ 3.90 (s, 1H), 1.02 (s, 9H). ESI-MS calcd. for C<sub>6</sub>H<sub>11</sub>O<sub>3</sub> ([M-H]<sup>-</sup>) 131.1, found 131.4.

**8** (colorless oil): <sup>1</sup>H NMR (400 MHz, CDCl<sub>3</sub>) δ 9.64 (br s, 1H), 3.83 (s, 1H), 0.97 (s, 9H), 0.93 (s, 9H), 0.08 (s, 3H), 0.06 (s, 3H); <sup>13</sup>C NMR (100 MHz, CDCl<sub>3</sub>) δ 176.6, 80.0, 35.4, 26.0, 25.8, 18.3, -5.2(2 C); MS (ESI<sup>-</sup>) calcd for C<sub>12</sub>H<sub>25</sub>O<sub>3</sub>Si [M - H]<sup>-</sup> 245.2, found 245.2.

**9** (colorless oil): <sup>1</sup>H NMR (400 MHz, CDCl<sub>3</sub>) δ 4.09 (s, 1H), 2.81 (br, 4H), 1.05 (s, 9H), 0.92 (s, 9H), 0.12 (s, 3H), 0.09 (s, 3H); <sup>13</sup>C NMR (100 MHz, CDCl<sub>3</sub>) δ 169.1, 168.1, 78.5, 36.0, 25.7 (8 C),

18.2, -5.2, -5.5; MS (ESI<sup>-</sup>) calcd for C<sub>16</sub>H<sub>29</sub>NO<sub>5</sub>Si[M]<sup>-</sup> 343.2, found 342.8.

**11** (a yellow solid): MS (ESI<sup>-</sup>) calcd for C<sub>25</sub>H<sub>41</sub>N<sub>6</sub>O<sub>8</sub>SSi [M-H]<sup>-</sup> 613.2, found 613.6.

**1** (a white solid): <sup>1</sup>H NMR (400 MHz, CD<sub>3</sub>OD) δ 8.57 (s, 1H), 8.33 (s, 1H), 6.38 (s, 1H), 5.05 – 5.00 (m, 1H), 4.79 – 4.77 (m, 1H), 4.74 – 4.70 (m, 1H), 4.40 – 4.37 (m, 1H), 4.14 – 4.10 (m, 1H), 3.62 (s, 1H), 0.99 (s, 9H); <sup>13</sup>C NMR (100MHz, CD<sub>3</sub>OD) δ 179.0, 158.7, 150.3, 140.9, 140.6, 121.2, 95.3, 85.2, 80.3, 77.2, 71.7, 59.7, 36.1, 26.5; MS (ESI<sup>-</sup>) calcd for C<sub>16</sub>H<sub>23</sub>N<sub>6</sub>O<sub>8</sub>S [M-H]<sup>-</sup> 459.1, found 459.2. HRMS (ESI<sup>-</sup>) calcd for C<sub>16</sub>H<sub>23</sub>N<sub>6</sub>O<sub>8</sub>S [M-H]<sup>-</sup> 459.1304, found 459.1310.

**13** (a white solid): <sup>1</sup>H NMR (400 MHz, CDCl<sub>3</sub>) δ 8.36 (s, 1H), 8.03 (s, 1H), 6.48 (d, *J* = 3.6 Hz, 1H), 5.59 (s, 2H), 4.34 – 4.32 (m, 1H), 4.19 – 4.16 (m, 1H), 4.03 – 3.98 (m, 1H), 3.88 – 3.84 (m, 2H), 0.94 (s, 9H), 0.92 (s, 9H), 0.72 (s, 9H), 0.15 (s, 6H), 0.09 (s, 3H), 0.08 (s, 3H), -0.08 (s, 3H), -0.45 (s, 3H); <sup>13</sup>C NMR (75 MHz, CDCl<sub>3</sub>) δ 155.5, 153.0, 149.6, 140.8, 119.3, 86.5, 85.9, 78.3, 77.6, 63.0, 26.1, 25.9, 25.7, 18.5, 18.1, 17.9, -4.4, -5.2, -5.5; MS (ESI<sup>+</sup>) calcd for C<sub>28</sub>H<sub>56</sub>N<sub>5</sub>O<sub>4</sub>Si<sub>3</sub>[M+H]<sup>+</sup> 610.4, found 610.0.

**14** (a white solid): <sup>1</sup>H NMR (400 MHz, CDCl<sub>3</sub>) δ 8.30 (s, 1H), 8.05 (s, 1H), 6.44 (d, *J* = 4.0 Hz, 1H), 5.83 (s, 2H), 4.38 – 4.34 (m, 1H), 4.31 – 4.27 (m, 1H), 4.13 (s, 1H), 4.08 – 4.04 (m, 1H), 3.92 – 3.88 (m, 2H), 0.94 (s, 9H), 0.67 (s, 9H), 0.16 (s, 6H), -0.06 (s, 3H), -0.41 (s, 3H); <sup>13</sup>C NMR (75 MHz, CD<sub>3</sub>OD) δ 156.8, 153.6, 149.7, 141.9, 119.5, 88.0, 87.1, 79.1, 78.4, 62.6, 26.2, 26.0, 18.6, 18.3, -4.2, -4.4, -4.8, -5.4; MS (ESI<sup>+</sup>) calcd for C<sub>22</sub>H<sub>42</sub>N<sub>5</sub>O<sub>4</sub>Si<sub>2</sub>[M+H]<sup>+</sup> 496.3, found 496.0.

**15** (a white solid): <sup>1</sup>H NMR (400 MHz, CDCl<sub>3</sub>) δ 8.22 (s, 2H), 6.48 (d, *J* = 3.2 Hz, 1H), 4.48 (dd, *J* = 10.4, 7.2 Hz, 1H), 4.40 – 4.24 (m, 4H), 0.98 (s, 9H), 0.72 (s, 9H), 0.22 (s, 6H), -0.02 (s, 3H), -0.43 (s, 3H); <sup>13</sup>C NMR (75 MHz, DMSO-*d*<sub>6</sub>) δ 155.9, 152.7, 149.1, 139.8, 118.3, 84.2, 81.9, 77.3, 76.5, 68.1, 25.7, 25.4, 17.6, 17.3, -4.6, -4.7, -5.4, -5.8; MS (ESI<sup>+</sup>) calcd for C<sub>22</sub>H<sub>43</sub>N<sub>6</sub>O<sub>6</sub>SSi<sub>2</sub> [M+H]<sup>+</sup> 575.2, found 574.8.

**16**(a yellow solid): ESI-MS calcd. for C<sub>34</sub>H<sub>65</sub>N<sub>6</sub>O<sub>8</sub>SSi<sub>3</sub> ([M-H]<sup>-</sup>) 801.4, found 801.5.

**2** (a white solid):  $^1\text{H}$  NMR (400 MHz,  $\text{CDCl}_3$ )  $\delta$  8.58 (s, 1H), 8.19 (s, 1H), 6.38 (d,  $J = 5.2$  Hz, 1H), 5.01 (d,  $J = 13.6$  Hz, 1H), 4.74 (d,  $J = 2.4$  Hz, 1H), 4.68 (dd,  $J = 16.0, 2.4$  Hz, 1H), 4.52 (t,  $J = 5.2$  Hz, 1H), 3.95 (t,  $J = 5.2$  Hz, 1H), 3.64 (s, 1H), 1.00 (s, 9H);  $^{13}\text{C}$  NMR (100 MHz,  $\text{CD}_3\text{OD}$ )  $\delta$  179.6, 158.7, 150.1, 142.2, 141.5, 121.3, 91.8, 85.7, 81.3, 80.2, 76.9, 59.8, 36.2, 26.5; MS (ESI $^-$ ) calcd for  $\text{C}_{16}\text{H}_{23}\text{N}_6\text{O}_8\text{S}$   $[\text{M}-\text{H}]^-$  459.1, found 459.2. HRMS (ESI $^-$ ) calcd for  $\text{C}_{16}\text{H}_{23}\text{N}_6\text{O}_8\text{S}$   $[\text{M}-\text{H}]^-$  459.1304, found 459.1318.

**17** (a white solid):  $^1\text{H}$  NMR (400 MHz,  $\text{CDCl}_3$ )  $\delta$  8.35 (s, 1H), 8.27 (s, 1H), 6.33 (d,  $J = 2.4$  Hz, 1H), 5.65 (s, 2H), 4.88 (d,  $J = 10.0$  Hz, 1H), 4.37 – 4.34 (m, 1H), 4.14 (d,  $J = 10.0$  Hz, 1H), 4.07 (s, 1H), 3.96 (d,  $J = 11.2$  Hz, 1H), 3.81 (d,  $J = 11.2$  Hz, 1H), 0.93 (s, 9H), 0.93 (s, 9H), 0.15 (s, 6H), 0.14 (s, 6H); MS (ESI $^+$ ) calcd for  $\text{C}_{22}\text{H}_{42}\text{N}_5\text{O}_4\text{Si}_2$   $[\text{M}+\text{H}]^+$  496.3, found 496.4.

**18** (a white solid):  $^1\text{H}$  NMR (400 MHz,  $\text{CDCl}_3$ )  $\delta$  8.32 (s, 1H), 8.16 (s, 1H), 6.25 (dd,  $J = 15.6, 1.6$  Hz, 1H), 6.05 (s, 2H), 5.32 (dd,  $J = 52.8, 1.6$  Hz, 1H), 4.73 – 4.64 (m, 1H), 4.16 – 4.12 (m, 1H), 4.02 (dd,  $J = 12.0, 2.4$  Hz, 1H), 3.79 (dd,  $J = 12.0, 2.4$  Hz, 1H), 0.93 (s, 9H), 0.89 (s, 9H), 0.14 (s, 3H), 0.13 (s, 3H), 0.08 (s, 3H), 0.06 (s, 3H);  $^{13}\text{C}$  NMR (75 MHz,  $\text{CDCl}_3$ )  $\delta$  155.8, 153.3, 149.4, 139.3, 120.1, 93.0 (d,  $J = 191.3$  Hz), 87.0 (d,  $J = 33.0$  Hz), 84.0, 69.4 (d,  $J = 15.8$  Hz), 61.3, 26.0, 25.8, 18.5, 18.2, -4.6, -4.9, -5.3, -5.4; MS (ESI $^+$ ) calcd for  $\text{C}_{22}\text{H}_{41}\text{FN}_5\text{O}_3\text{Si}_2$   $[\text{M}+\text{H}]^+$  498.3, found 498.3.

**19** (a white solid):  $^1\text{H}$  NMR (400 MHz,  $\text{CD}_3\text{OD}$ )  $\delta$  8.37 (s, 1H), 8.19 (s, 1H), 6.27 (dd,  $J = 15.2, 4.0$  Hz, 1H), 5.51 (dt,  $J = 52.8, 4.0$  Hz, 1H), 4.79 – 4.72 (m, 1H), 4.15 (d,  $J = 2.0$  Hz, 1H), 3.90 (d,  $J = 12.4$  Hz, 1H), 3.71 (dd,  $J = 12.8, 2.4$  Hz, 1H), 0.96 (s, 9H), 0.18 (s, 3H), 0.17 (s, 3H);  $^{13}\text{C}$  NMR (75 MHz,  $\text{DMSO}-d_6$ )  $\delta$  156.2, 152.6, 148.8, 139.6, 119.2, 92.3 (d,  $J = 189.0$  Hz), 85.7 (d,  $J = 32.3$  Hz), 84.7, 70.0 (d,  $J = 15.0$  Hz), 60.3, 25.6, 17.9, -4.9, -5.1; MS (ESI $^+$ ) calcd for  $\text{C}_{16}\text{H}_{27}\text{FN}_5\text{O}_3\text{Si}$   $[\text{M}+\text{H}]^+$  384.2, found 384.2.

**20** (a white solid):  $^1\text{H}$  NMR (300 MHz,  $\text{CD}_3\text{OD}$ )  $\delta$  8.26 (s, 1H), 8.21 (s, 1H), 6.31 (dd,  $J = 17.1, 2.7$  Hz, 1H), 5.53 (ddd,  $J = 52.5, 4.5, 2.7$  Hz, 1H), 4.94 – 4.91 (m,

1H), 4.46 – 4.40 (m, 1H), 4.32 – 4.26 (m, 2H), 0.97 (s, 9H), 0.21 (s, 1H), 0.19 (s, 1H); <sup>13</sup>C NMR (75 MHz, DMSO-*d*<sub>6</sub>) δ 156.2, 152.8, 148.8, 139.7, 119.1, 92.2 (d, *J* = 187.5 Hz), 86.1 (d, *J* = 33.8 Hz), 80.3, 70.2 (d, *J* = 15.0 Hz), 67.7, 25.6, 17.8, -4.9, -5.1; MS (ESI+) calcd for C<sub>16</sub>H<sub>28</sub>FN<sub>6</sub>O<sub>5</sub>SSi[M+H]<sup>+</sup> 463.2, found 463.2.

**21** (a yellow solid): ESI-MS calcd. for C<sub>28</sub>H<sub>50</sub>FN<sub>6</sub>O<sub>7</sub>SSi<sub>2</sub> ([M-H]<sup>-</sup>) 689.3, found 689.3.

**3** (a white solid): <sup>1</sup>H NMR (400 MHz, CD<sub>3</sub>OD) δ 8.56 (s, 1H), 8.30 (s, 1H), 6.68 (d, *J* = 6.8 Hz, 1H), 4.97 (dd, *J* = 51.6, 4.4 Hz, 1H), 4.86 – 4.82 (m, 2H), 4.76 (dd, *J* = 14.0, 2.8 Hz, 1H), 4.50 (dt, *J* = 18.8, 4.4 Hz, 1H), 3.63 (s, 1H), 0.98 (s, 9H); <sup>13</sup>C NMR (100 MHz, CD<sub>3</sub>OD) δ 179.1, 158.7, 150.4, 141.0, 140.5, 121.3, 94.3 (d, *J* = 192.0 Hz), 92.4 (d, *J* = 31.0 Hz), 84.8, 80.2 (d, *J* = 7.0 Hz), 71.5 (d, *J* = 16.0 Hz), 59.5, 36.2, 26.5; HRMS (ESI-) calcd for C<sub>16</sub>H<sub>22</sub>FN<sub>6</sub>O<sub>7</sub>S[M-H]<sup>-</sup> 461.1260, found 461.1280 (error 4.3 ppm).

**23** (a yellow solid): MS (ESI-) calcd for C<sub>26</sub>H<sub>43</sub>N<sub>6</sub>O<sub>7</sub>SSi[M-H]<sup>-</sup> 611.3, found 611.8.

**4** (a white solid): <sup>1</sup>H NMR (400 MHz, CD<sub>3</sub>OD) δ 8.56 (s, 1H), 8.27 (s, 1H), 5.04 (d, *J* = 4.8 Hz, 1H), 4.93 (dd, *J* = 13.6, 3.6 Hz, 1H), 4.55 (dd, *J* = 13.6, 2.8 Hz, 1H), 4.11 – 4.07 (m, 1H), 4.02 (d, *J* = 4.8 Hz, 1H), 3.69 (s, 1H), 3.05 – 2.96 (m, 1H), 2.80 (d, *J* = 10.0 Hz, 1H), 2.04 (d, *J* = 14.4 Hz, 1H), 1.00 (s, 9H); <sup>13</sup>C NMR (100 MHz, CD<sub>3</sub>OD) δ 179.1, 158.6, 150.5, 143.5, 141.2, 121.7, 80.3, 77.5, 74.4, 67.4, 60.6, 44.0, 36.1, 33.5, 26.5; MS (ESI-) calcd for C<sub>17</sub>H<sub>25</sub>N<sub>6</sub>O<sub>7</sub>S[M-H]<sup>-</sup> 457.2, found 457.3. HRMS (ESI-) calcd for C<sub>17</sub>H<sub>25</sub>N<sub>6</sub>O<sub>7</sub>S [M-H]<sup>-</sup> 457.1511, found 457.1510.

**26** (a white solid): <sup>1</sup>H NMR (400 MHz, CDCl<sub>3</sub>) δ 7.52 (d, *J* = 6.8 Hz, 2H), 7.43–7.33 (m, 3H), 5.51 (s, 1H), 3.69–3.60(m, 5H), 1.14 (s, 3H), 0.84 (s, 3H). <sup>13</sup>C NMR (100 MHz, CDCl<sub>3</sub>) δ 138.4, 129.2, 128.4, 126.4, 102.2, 86.0, 79.0, 61.6, 31.7, 21.5, 19.3. MS (ESI+) calcd for C<sub>13</sub>H<sub>19</sub>O<sub>3</sub> [M+H]<sup>+</sup> 223.1, found 223.0.

**27** (a white solid): <sup>1</sup>H NMR (400 MHz, CDCl<sub>3</sub>) δ 7.80 (d, *J* = 8.0 Hz, 2H), 7.48 – 7.34 (m, 5H), 7.27 (d, *J* = 8.0 Hz, 2H), 5.43 (s, 1H), 4.28 (dd, *J* = 10.8, 2.0 Hz, 1H), 4.11 – 4.03 (m, 1H), 3.91 –

3.85 (m, 1H), 3.65 (dd,  $J = 30.0, 11.2$  Hz, 2H), 2.43 (s, 3H), 1.10 (s, 3H), 0.87 (s, 3H);  $^{13}\text{C}$  NMR (100 MHz,  $\text{CDCl}_3$ )  $\delta$  144.8, 138.0, 132.9, 129.8, 129.0, 128.2, 128.0, 126.2, 101.6, 82.5, 78.5, 69.5, 31.8, 21.7, 21.4, 18.8; MS (ESI+) calcd for  $\text{C}_{20}\text{H}_{24}\text{O}_5\text{SNa}$   $[\text{M}+\text{Na}]^+$  399.1, found 399.0.

**28** (a white solid):  $^1\text{H}$  NMR (400 MHz,  $\text{CDCl}_3$ )  $\delta$  7.55 (d,  $J = 6.8$  Hz, 2H), 7.43 – 7.32 (m, 3H), 5.58 (s, 1H), 3.81 (d,  $J = 9.2$  Hz, 1H), 3.74 (d,  $J = 11.2$  Hz, 1H), 3.65 (d,  $J = 11.2$  Hz, 1H), 3.46 (dd,  $J = 12.8, 9.2$  Hz, 1H), 3.20 (d,  $J = 13.2$  Hz, 1H), 1.16 (s, 3H), 0.84 (s, 3H);  $^{13}\text{C}$  NMR (100 MHz,  $\text{CDCl}_3$ )  $\delta$  138.1, 128.9, 128.3, 126.1, 101.7, 84.7, 78.8, 50.7, 32.3, 21.5, 18.9; MS (ESI+) calcd for  $\text{C}_{13}\text{H}_{17}\text{N}_3\text{O}_2\text{Na}$   $[\text{M}+\text{Na}]^+$  270.1, found 270.0.

**29** (a white solid):  $^1\text{H}$  NMR (400 MHz,  $\text{CDCl}_3$ )  $^1\text{H}$  NMR (300 MHz,  $\text{CDCl}_3$ )  $\delta$  7.56 – 7.28(m, 5H), 5.47 (s, 1H), 3.89 (br, 2H), 3.60 – 3.52 (m, 3H), 2.88 – 2.67 (m, 2H), 1.08 (s, 3H), 0.78 (s, 3H);  $^{13}\text{C}$  NMR (75 MHz,  $\text{CDCl}_3$ )  $\delta$  138.6, 128.8, 128.2, 126.1, 101.9, 87.5, 78.8, 41.4, 32.0, 21.4, 19.0; MS (ESI+) calcd for  $\text{C}_{13}\text{H}_{20}\text{NO}_2$   $[\text{M}+\text{H}]^+$  222.1, found 222.2.

**30** (a white solid):  $^1\text{H}$  NMR (400 MHz,  $\text{CDCl}_3$ )  $\delta$  8.09 (d,  $J = 9.2$  Hz, 2H), 7.50 – 7.33 (m, 7H), 5.45 (s, 1H), 3.80 – 3.70 (m, 2H), 3.61 (d,  $J = 11.2$  Hz, 1H), 3.57 – 3.49 (m, 1H), 3.32 – 3.21 (m, 1H), 1.20 (s, 3H), 0.89 (s, 3H);  $^{13}\text{C}$  NMR (100 MHz,  $\text{CDCl}_3$ )  $\delta$  154.3, 145.8, 137.7, 129.5, 128.4, 126.4, 125.4, 122.6, 102.1, 82.8, 78.3, 44.1, 31.9, 21.1, 18.7; MS (ESI+) calcd for  $\text{C}_{19}\text{H}_{22}\text{N}_2\text{O}_7\text{SNa}$   $[\text{M}+\text{Na}]^+$  445.1, found 444.8.

**32** (a white solid): MS (ESI+) calcd for  $\text{C}_{26}\text{H}_{35}\text{N}_7\text{O}_7\text{SNa}$   $[\text{M}+\text{Na}]^+$  612.2, found 611.8.

**5** (a white solid):  $^1\text{H}$  NMR (400 MHz,  $\text{CD}_3\text{OD}$ )  $\delta$  8.28 (s, 1H), 8.23 (s, 1H), 5.90 (d,  $J = 6.8$  Hz, 1H), 4.91 – 4.89 (m, 1H), 4.36 (dd,  $J = 5.2, 2.0$  Hz, 1H), 4.32 – 4.28 (m, 1H), 3.64 – 3.55 (m, 2H), 3.40 – 3.34 (m, 3H), 3.16 (dd,  $J = 12.4, 2.0$  Hz, 1H), 2.85 (dd,  $J = 12.8, 10.0$  Hz, 1H), 0.81 (s, 3H), 0.78 (s, 3H);  $^{13}\text{C}$  NMR (100 MHz,  $\text{CD}_3\text{OD}$ )  $\delta$  157.6, 153.9, 150.0, 142.5, 121.2, 91.6, 85.9, 76.3, 74.3, 73.0, 70.2, 46.1, 45.8, 39.6, 21.8, 20.1; HRMS (ESI-) calcd for  $\text{C}_{16}\text{H}_{26}\text{N}_7\text{O}_7\text{S}$   $[\text{M}-\text{H}]^-$  460.1620, found 460.1635.

化合物 7 ( $^1\text{H}$  NMR MS)

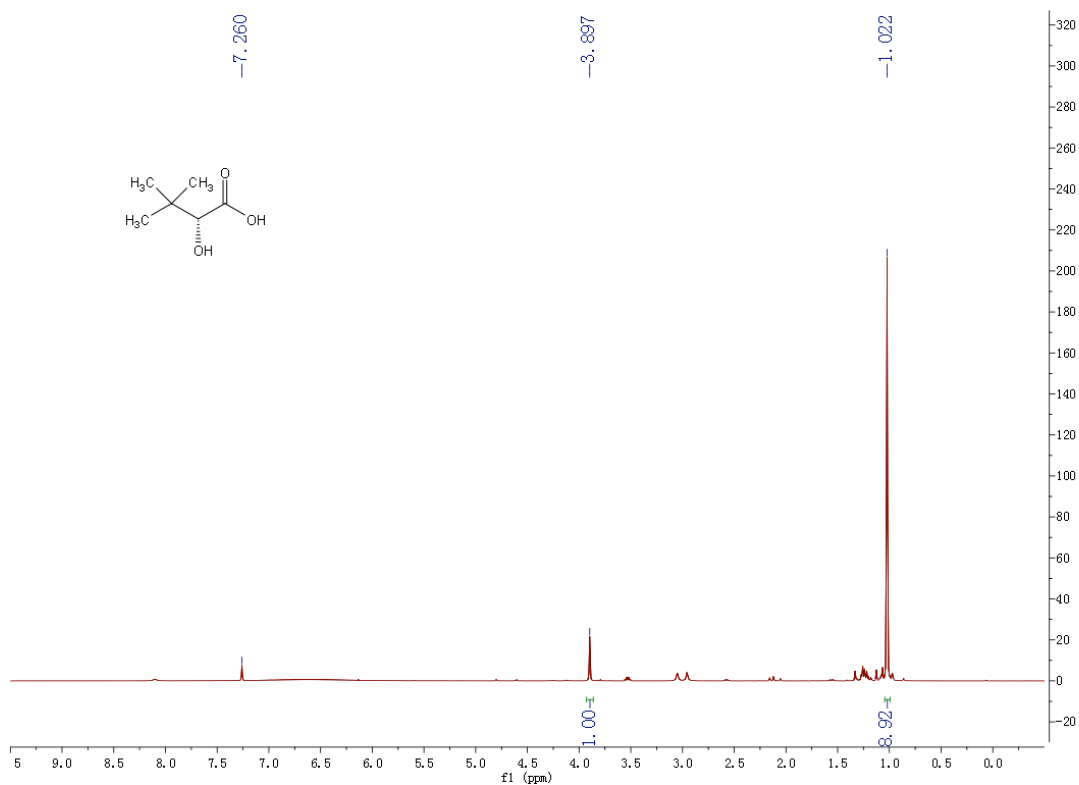

Print of window 80: MS Spectrum

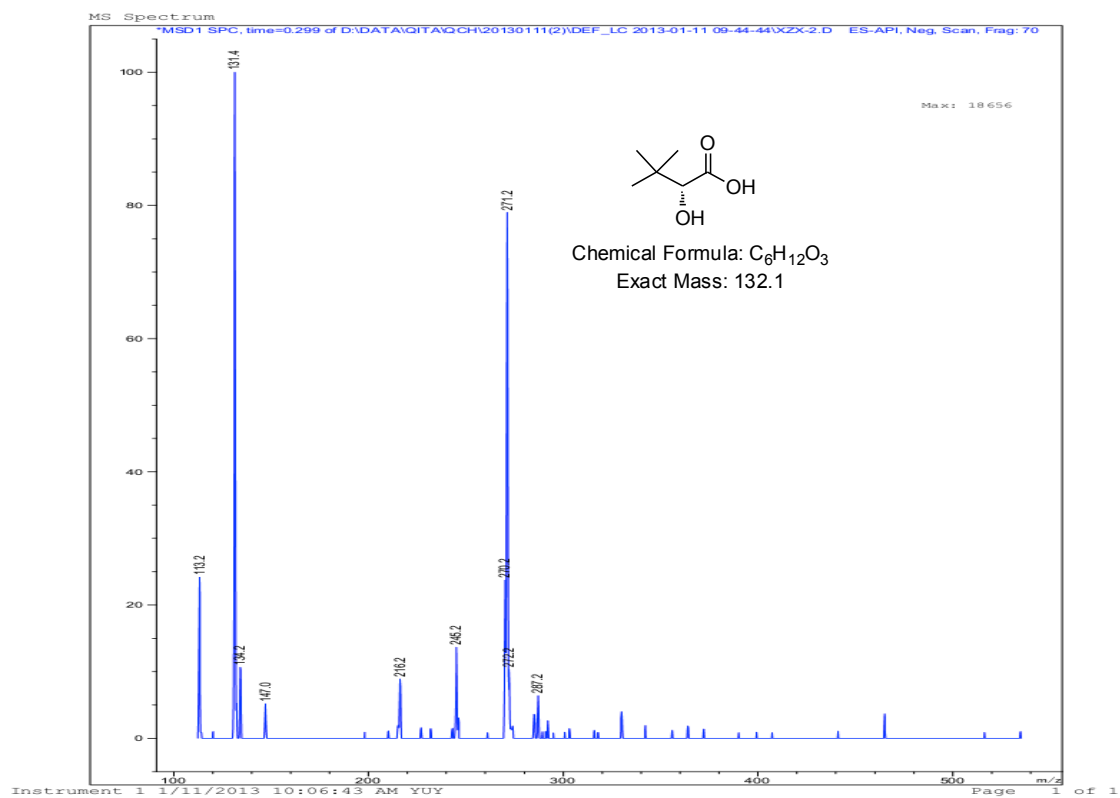

Instrument 1 1/11/2013 10:06:43 AM YUY Page 1 of 1

化合物 **8** ( $^1\text{H}$  NMR  $^{13}\text{C}$  NMR MS)

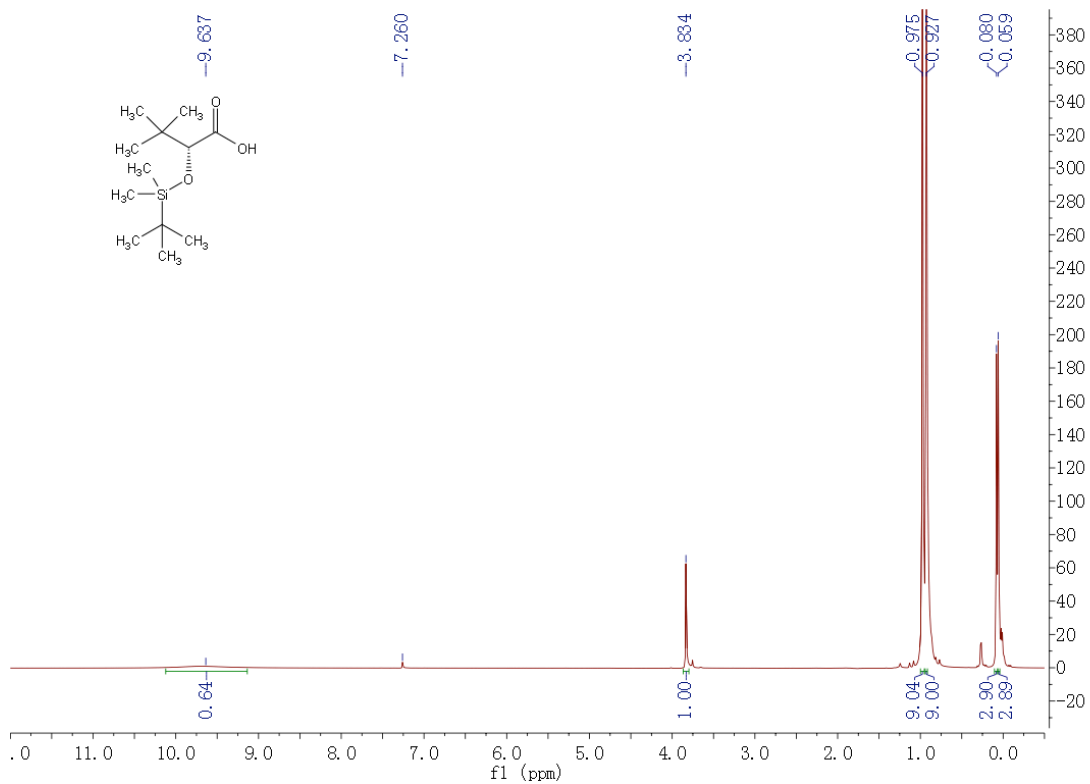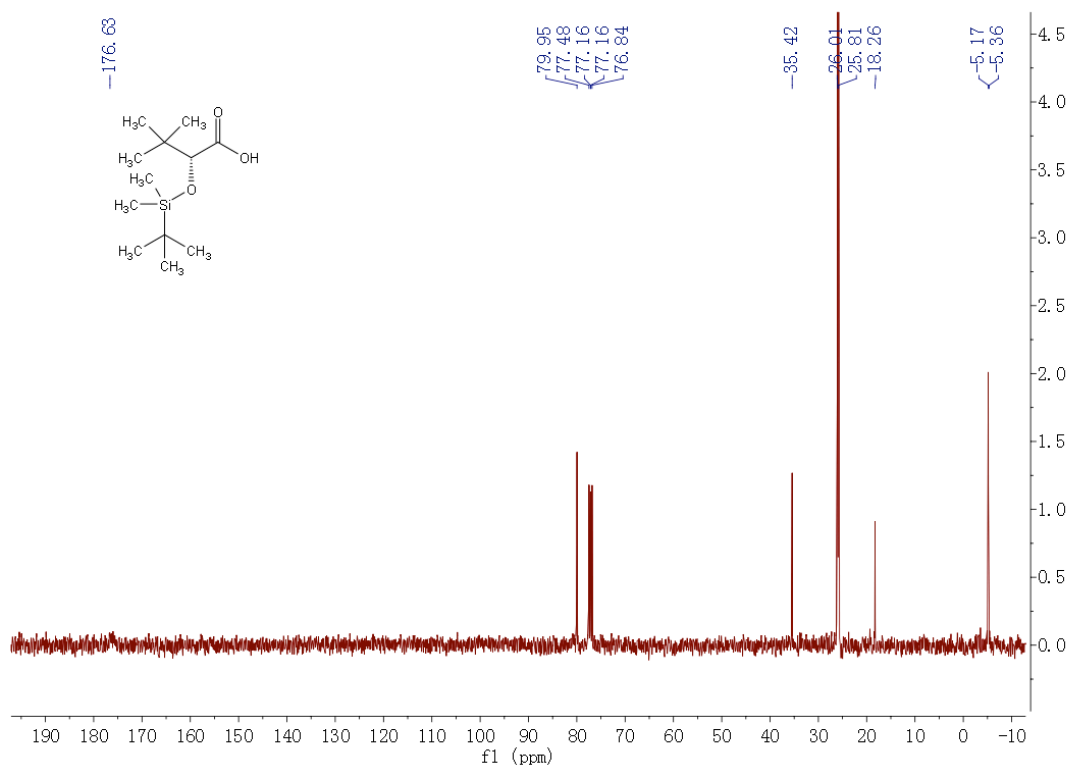

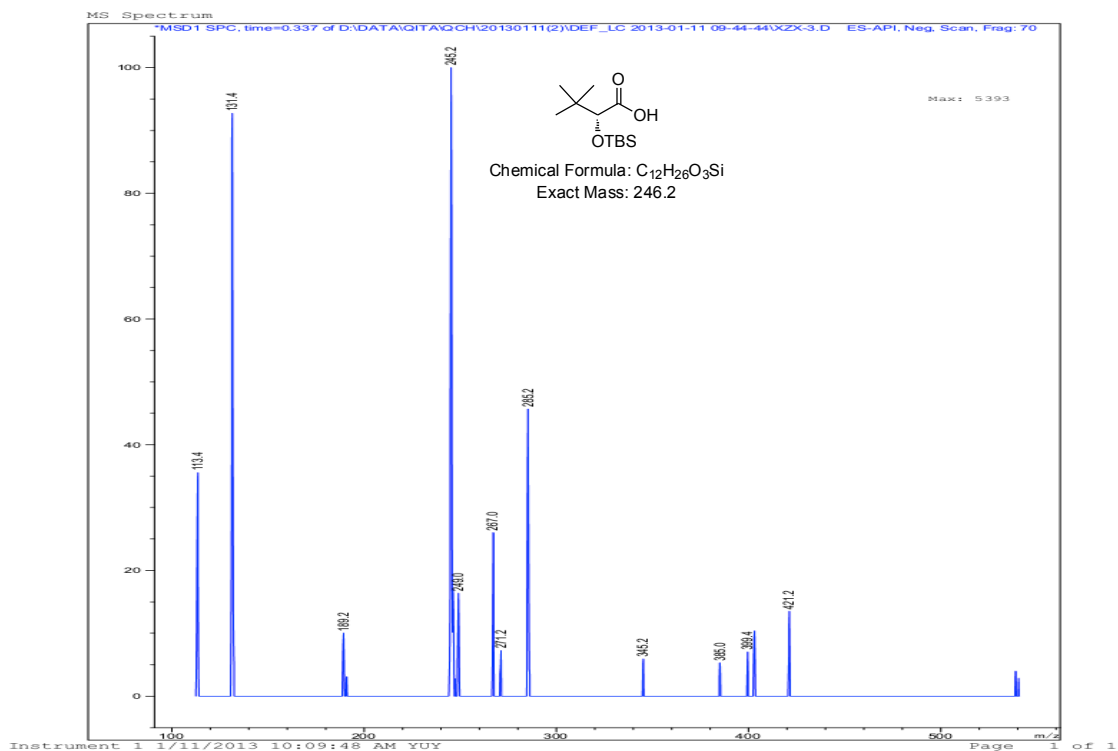

化合物 9 ( $^1H$  NMR  $^{13}C$  NMR MS)

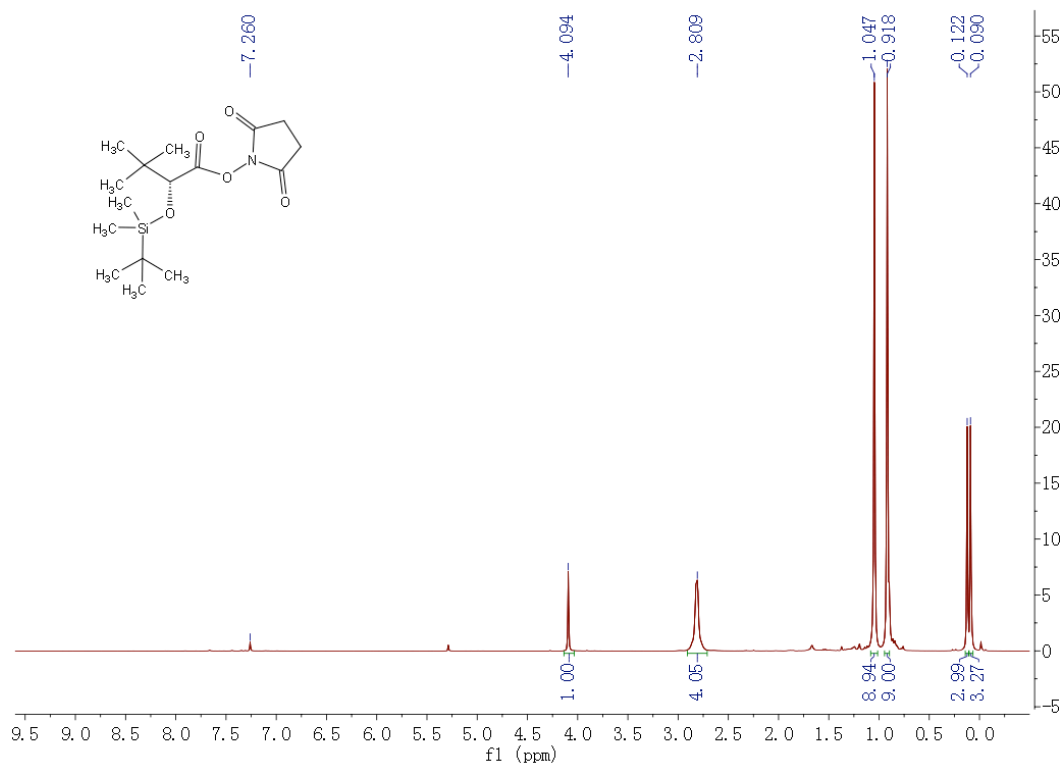



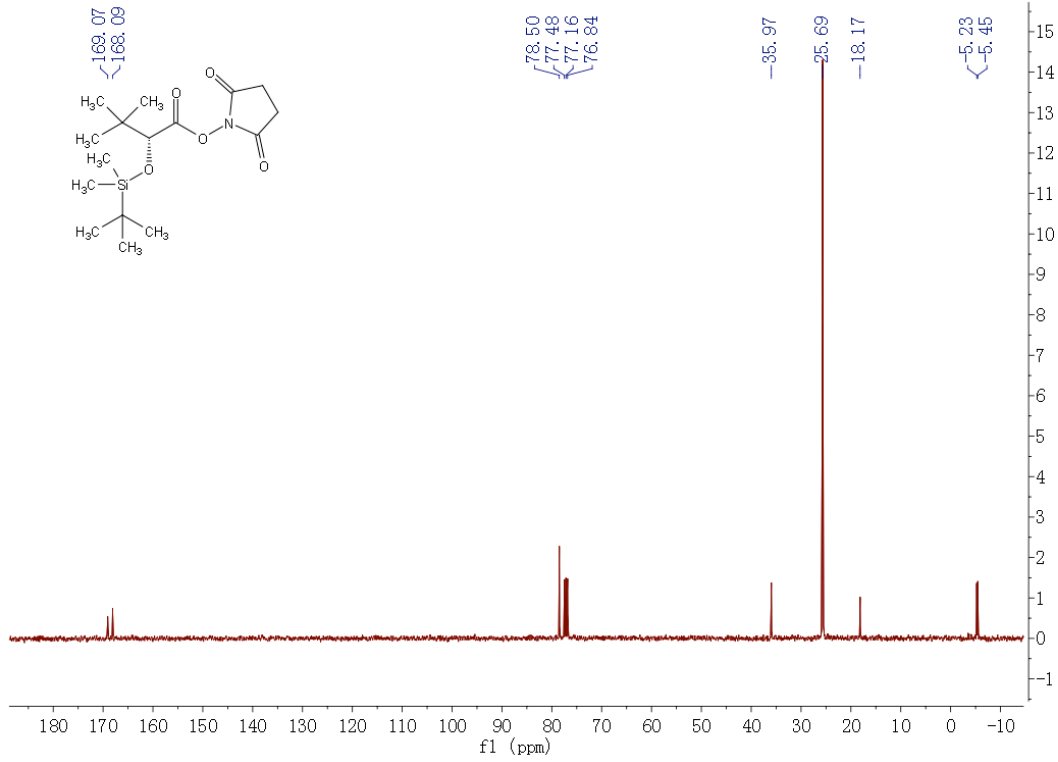

Print of window 80: MS Spectrum

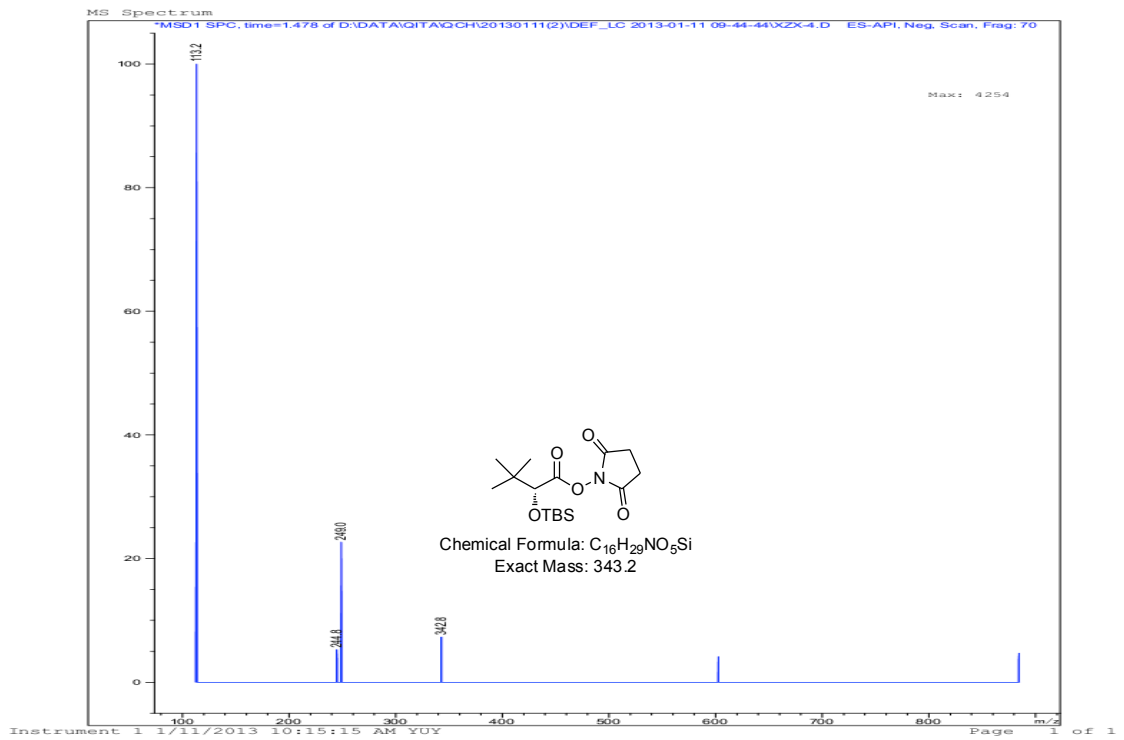

# 化合物 11(MS)

Print of window 80: MS Spectrum

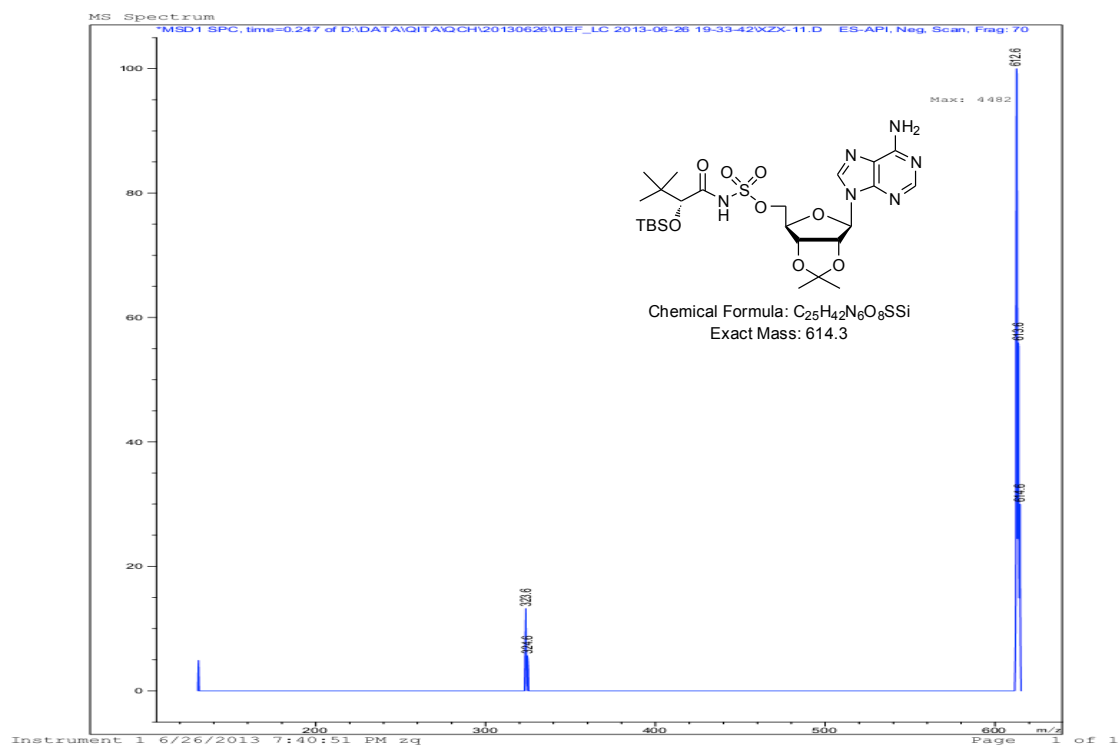

# 化合物 1(<sup>1</sup>H NMR <sup>13</sup>C NMR MS)

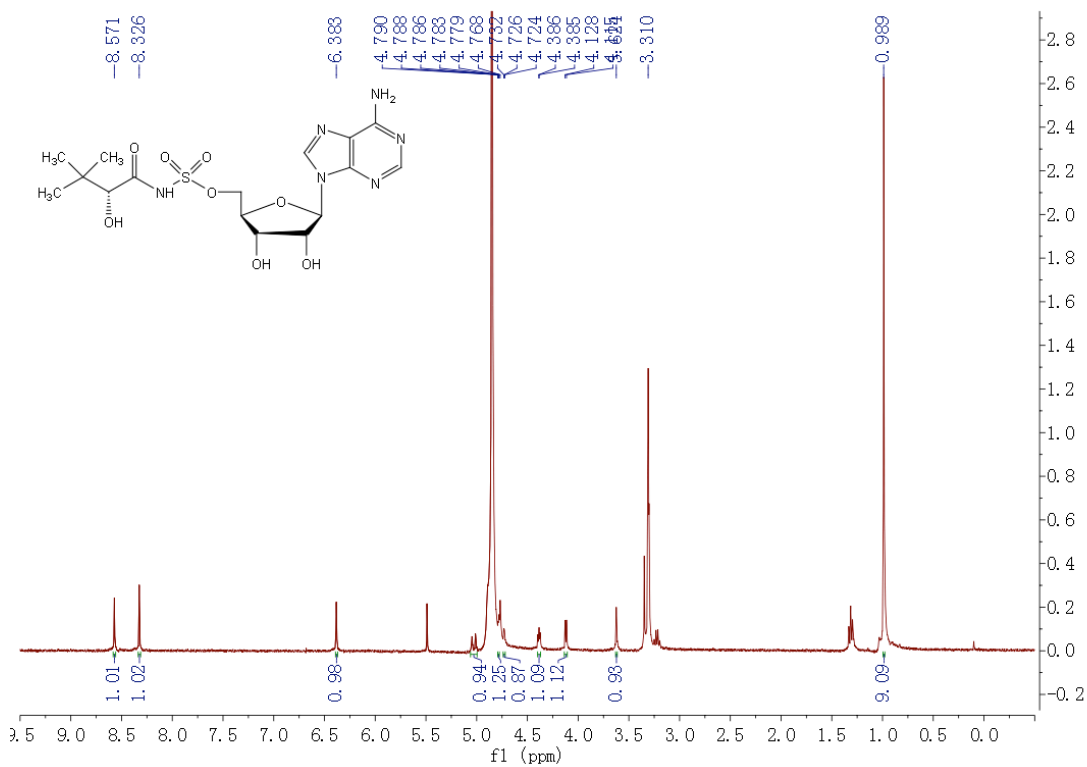

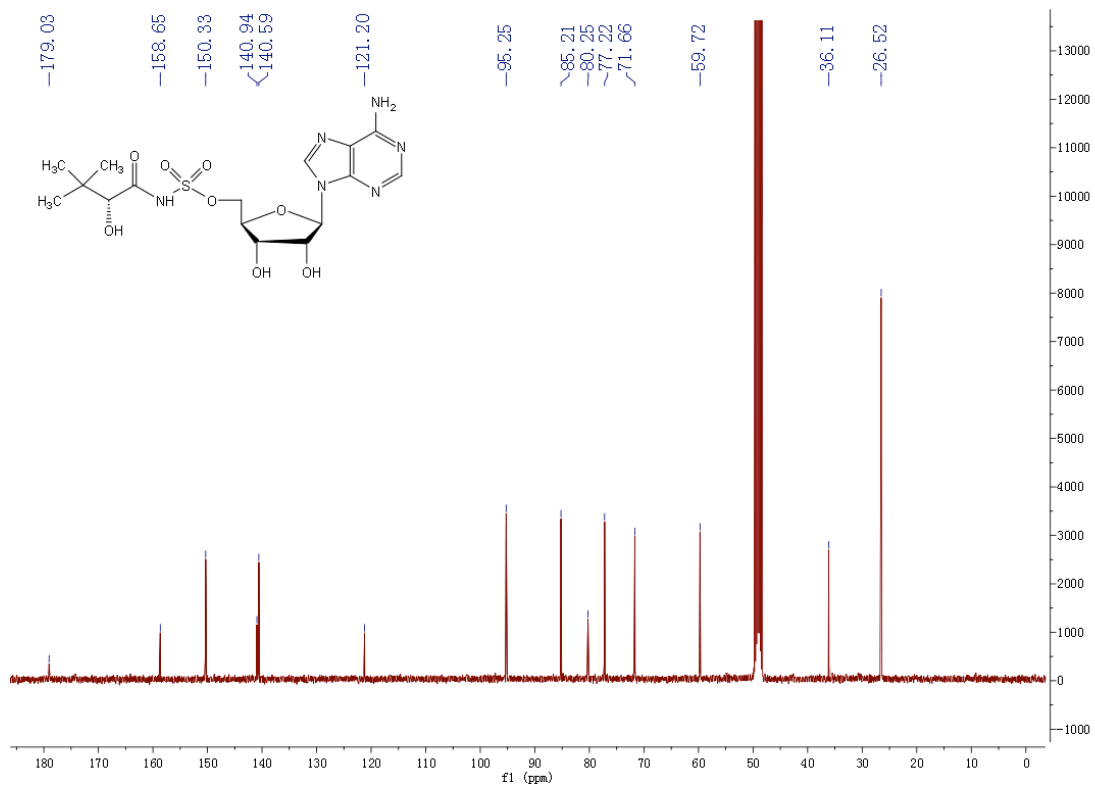

■ -EMS: 10 MCA scans from Sample 1 (xxx-02-182-4EMS(-)) of 9-4.wiff (Turbo Spray)

Max: 4.4e6 cps.

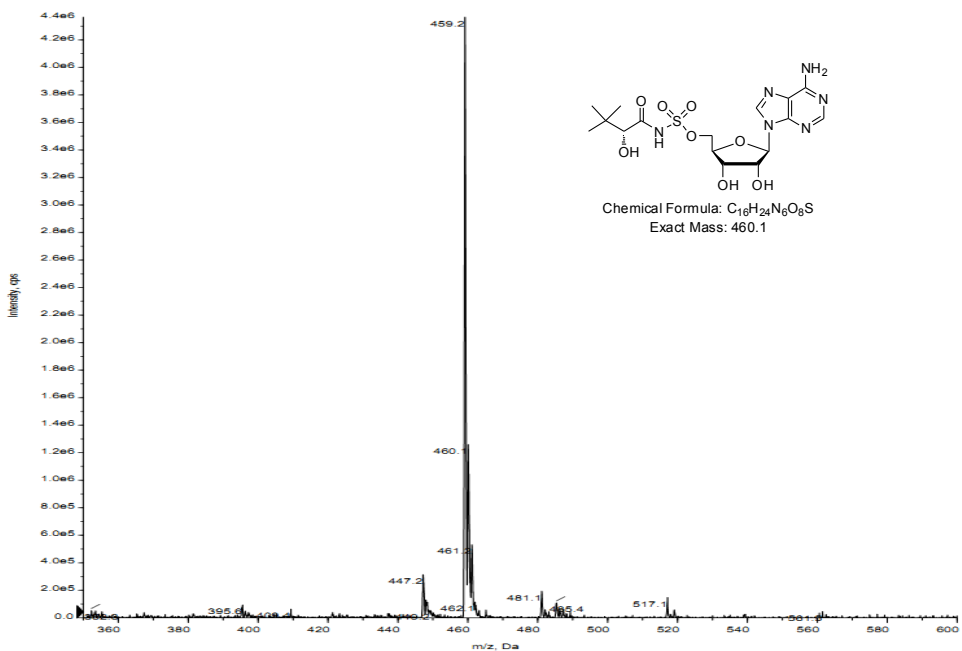

化合物 13 ( $^1\text{H NMR}$   $^{13}\text{C NMR}$  MS)

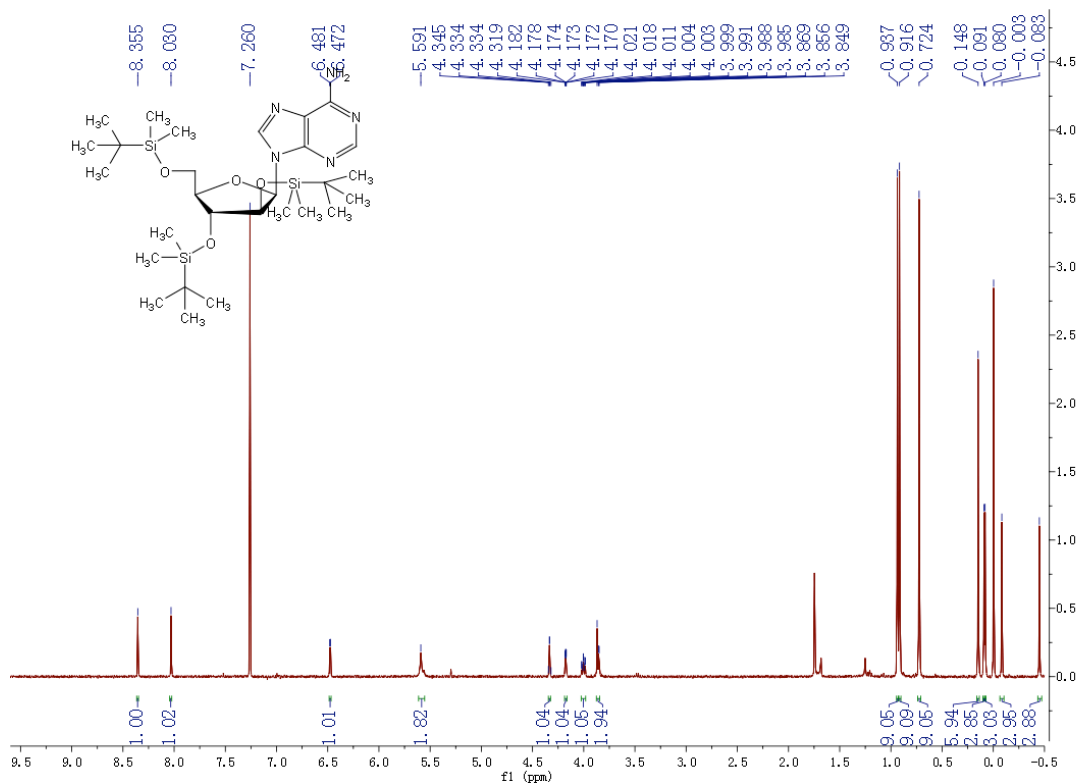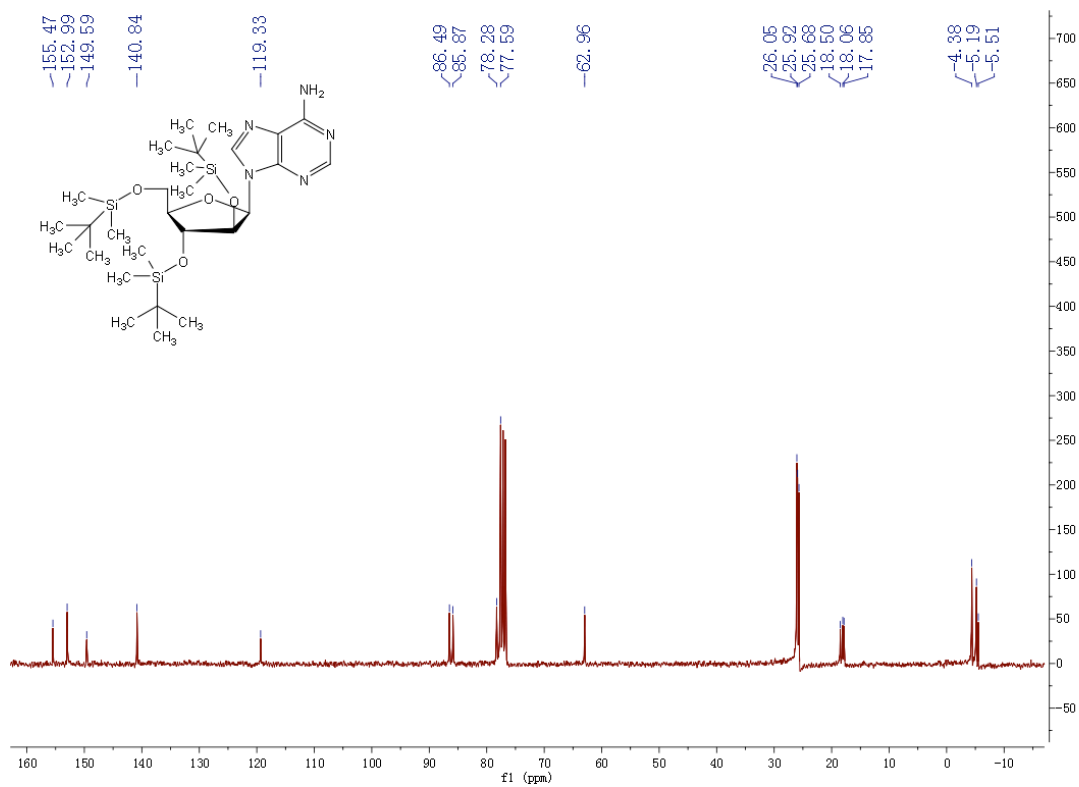

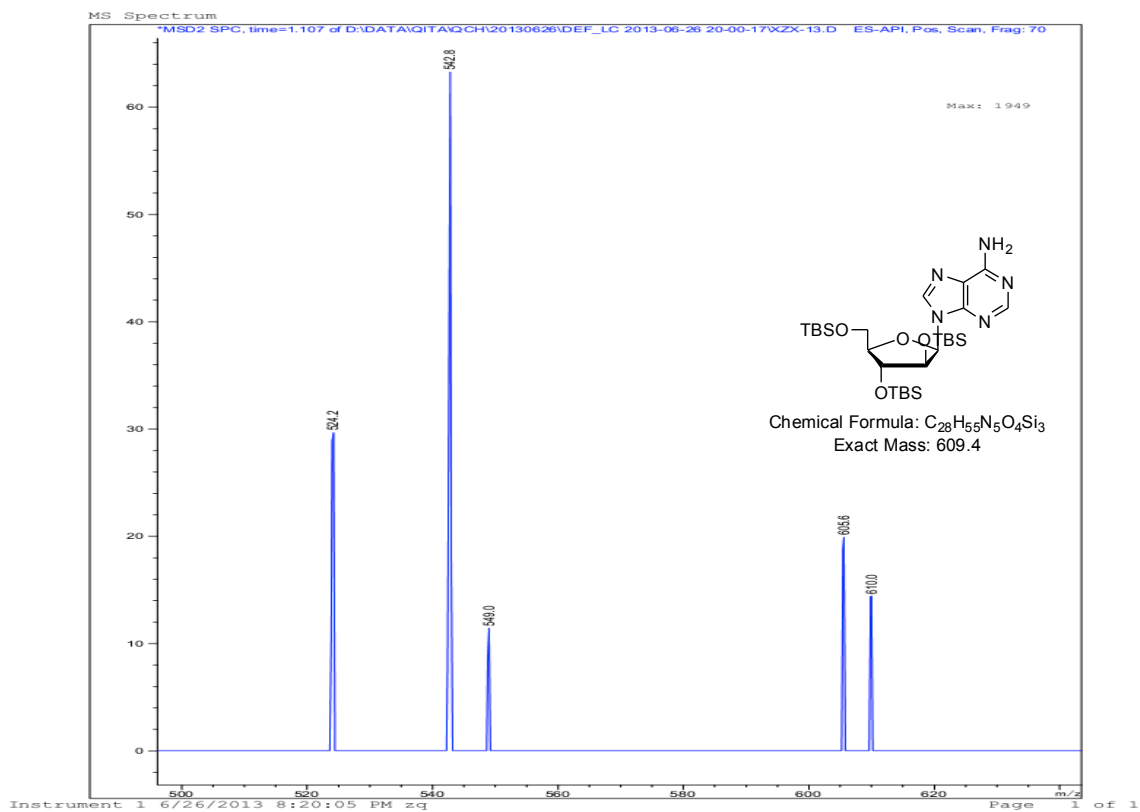

化合物 14 ( $^1H$  NMR  $^{13}C$  NMR MS)

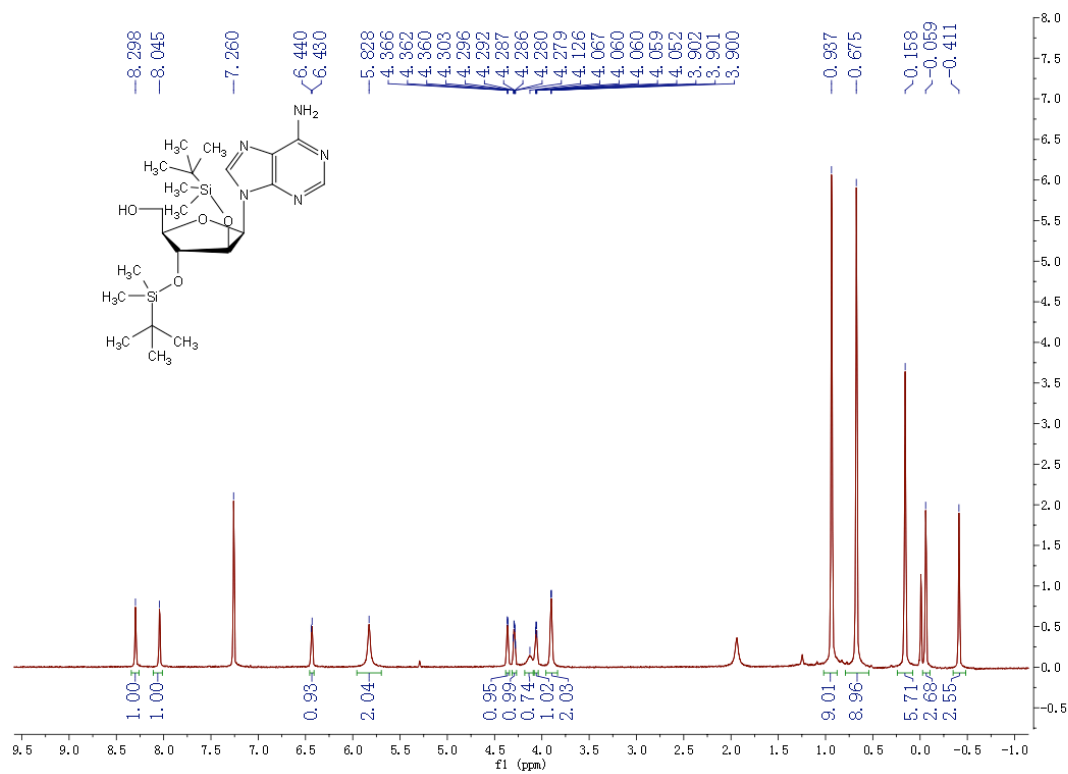

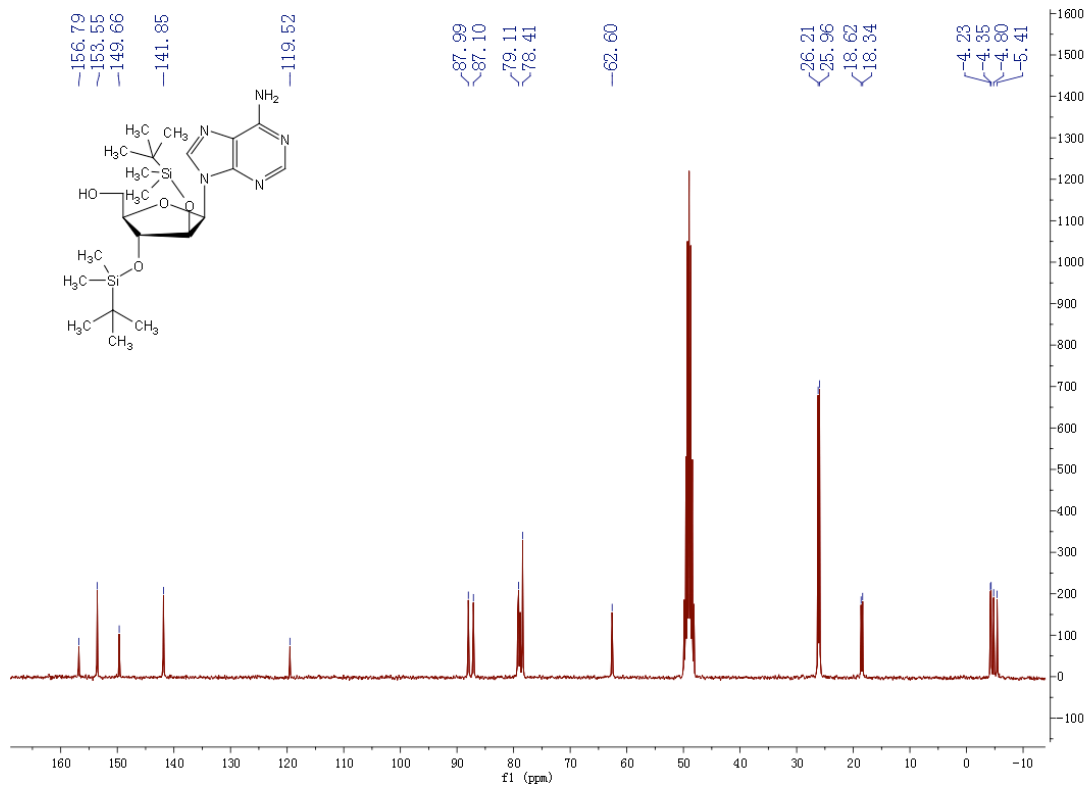

Print of window 80: MS Spectrum

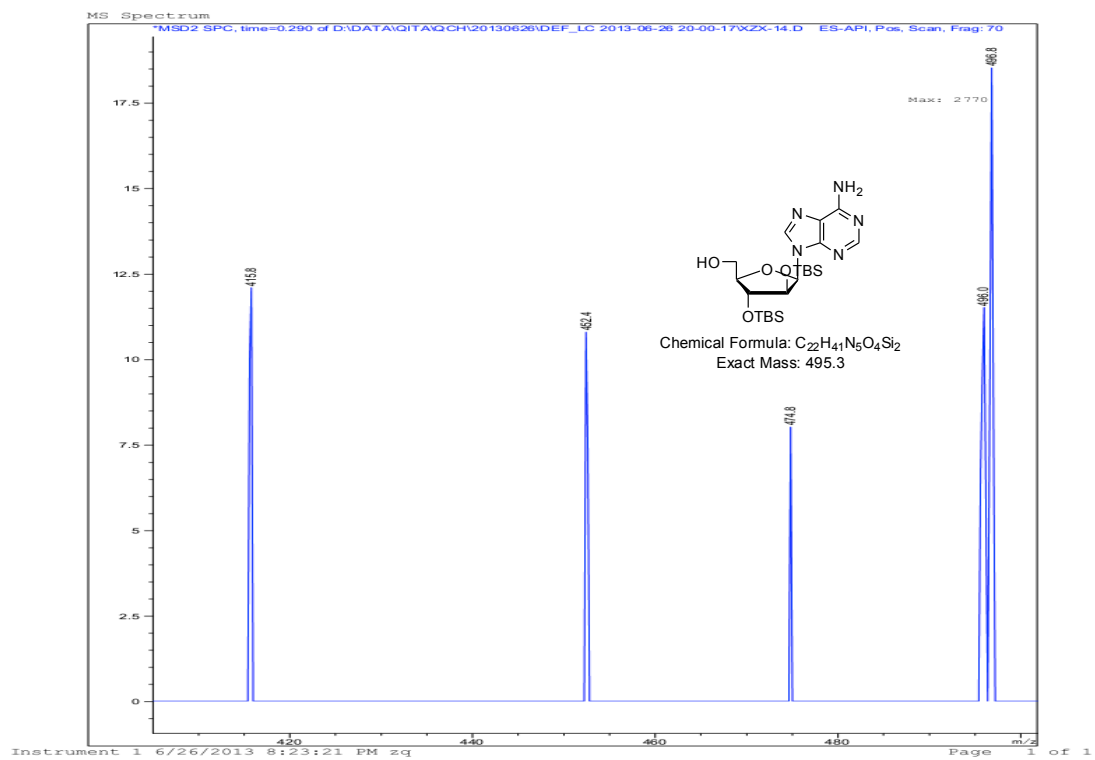

化合物 15 ( $^1\text{H NMR}$   $^{13}\text{C NMR}$  MS)

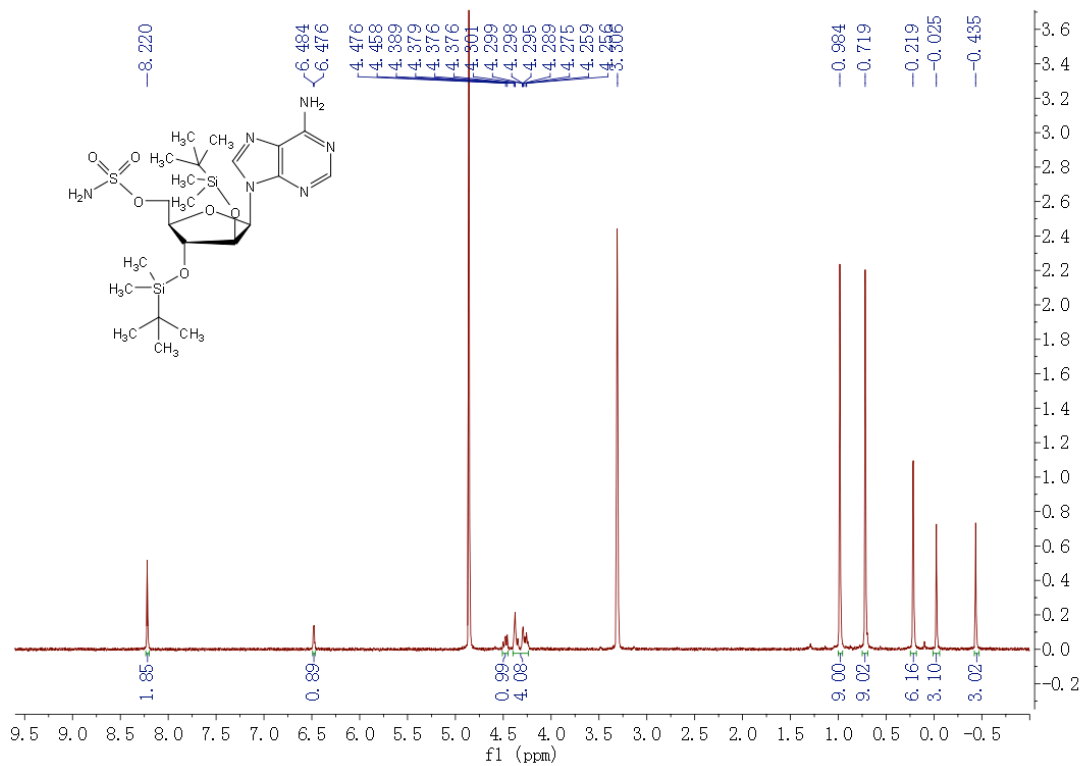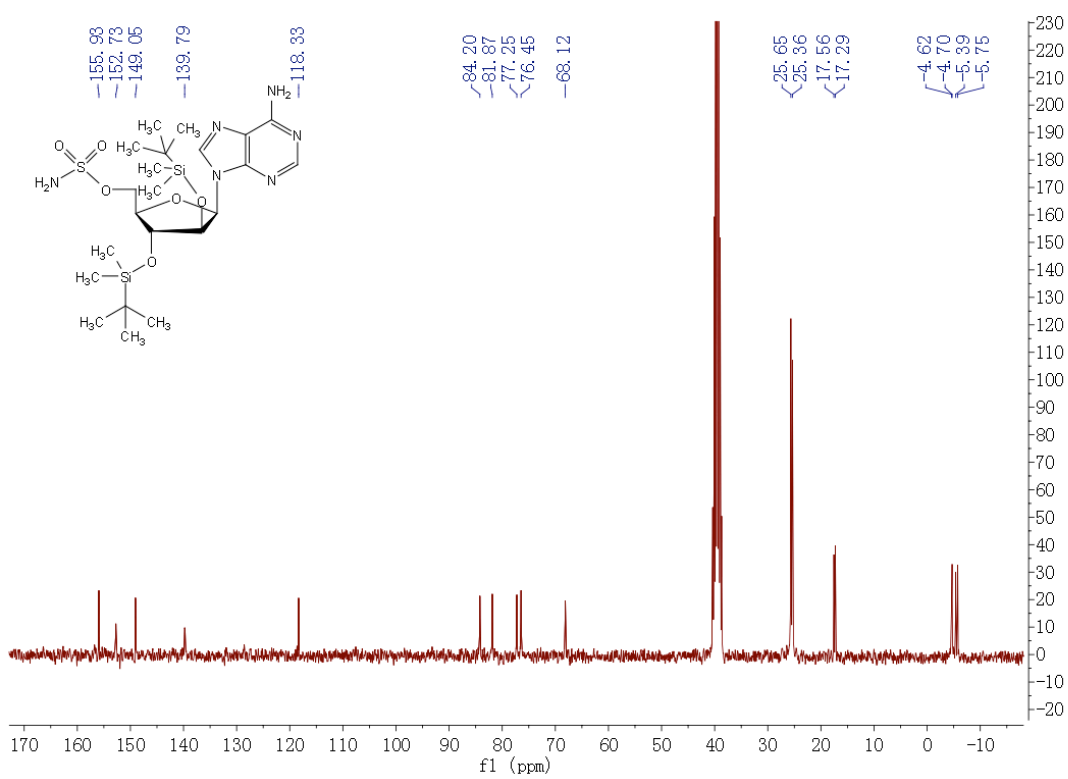

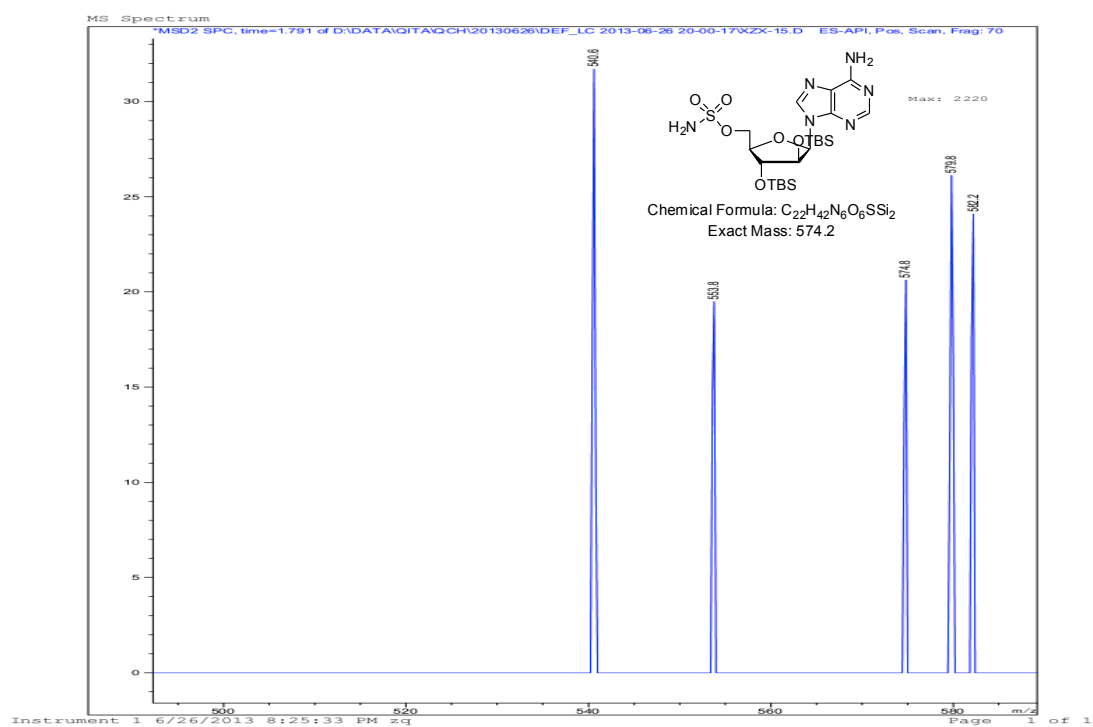

### 化合物 16(MS)

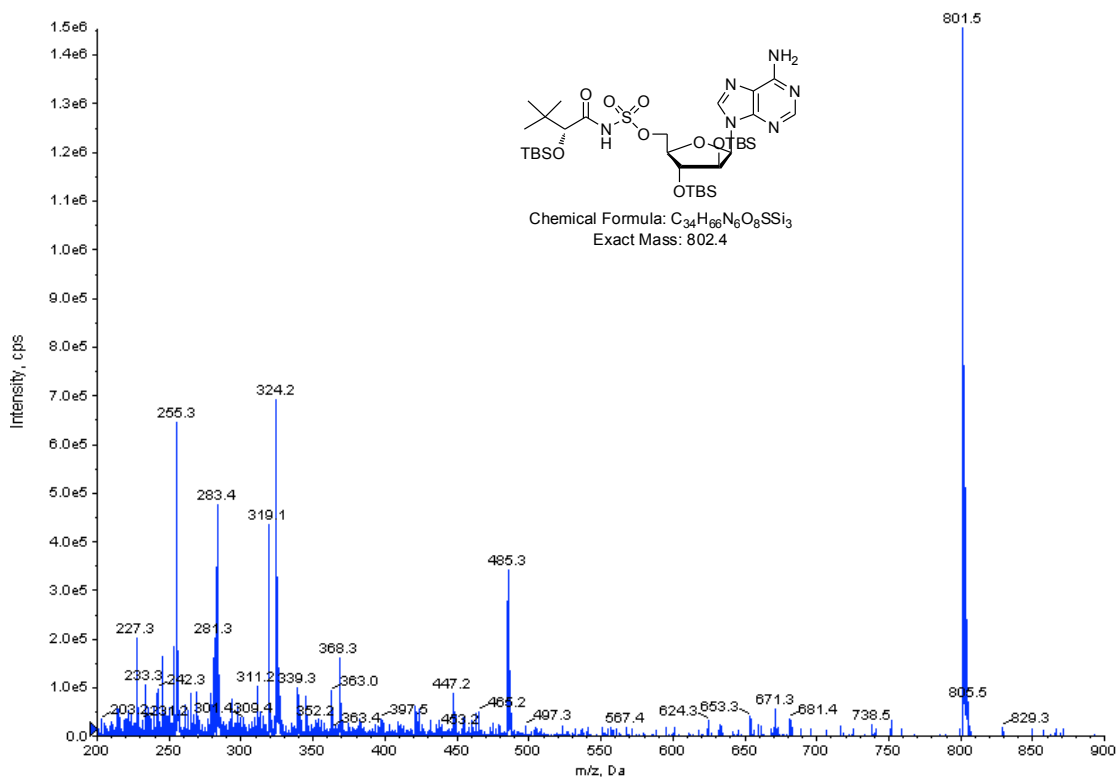



化合物 2 ( $^1\text{H NMR}$   $^{13}\text{C NMR}$  MS)

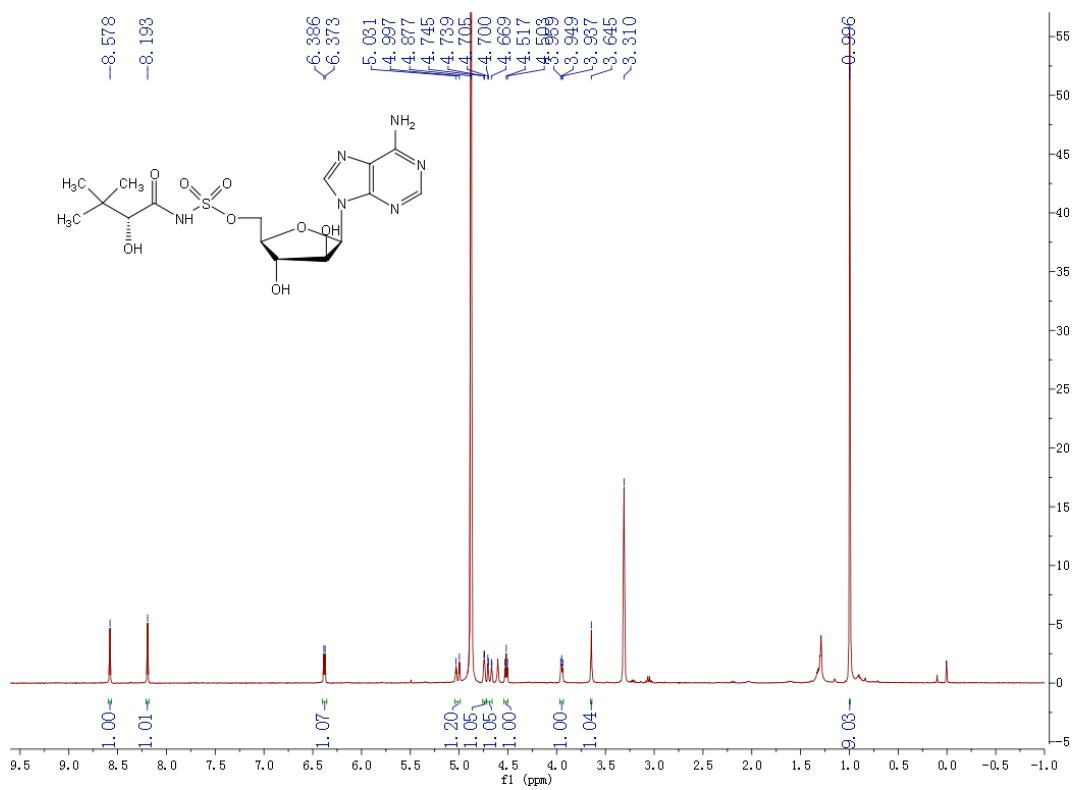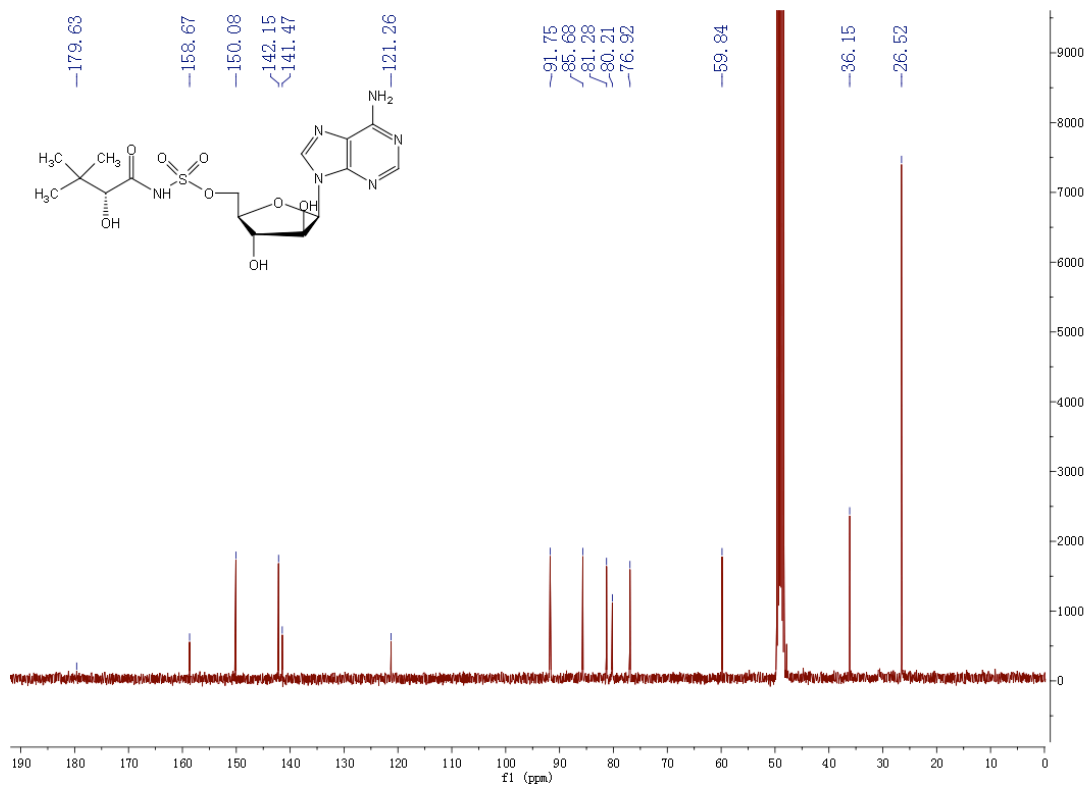

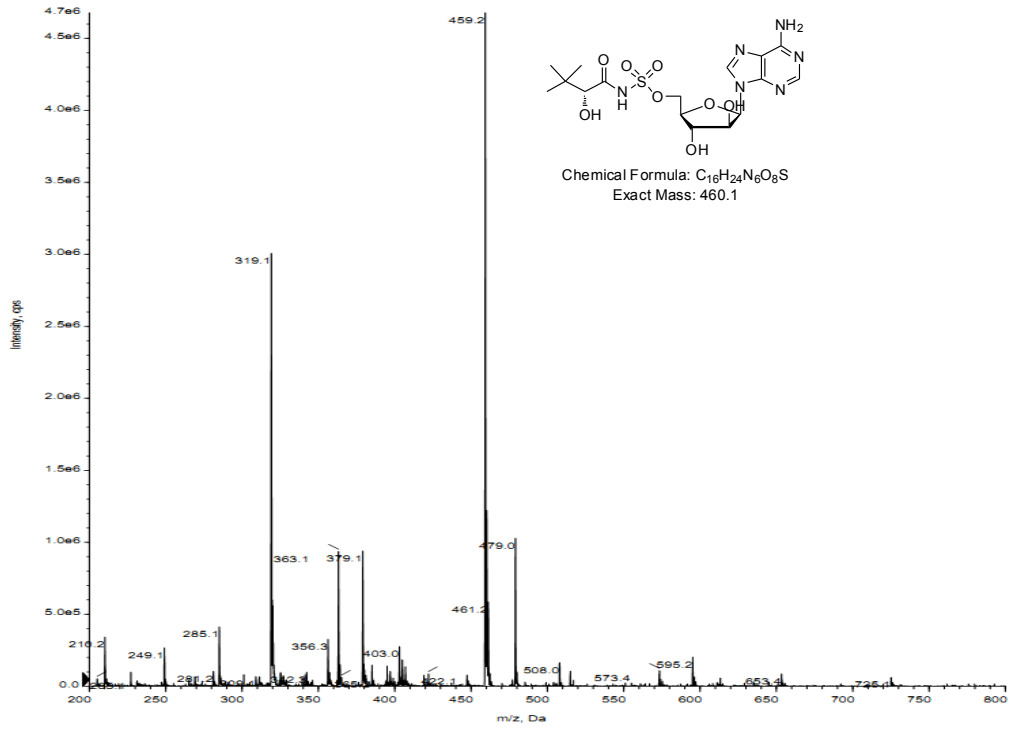

化合物 17 ( $^1H$  NMR MS)

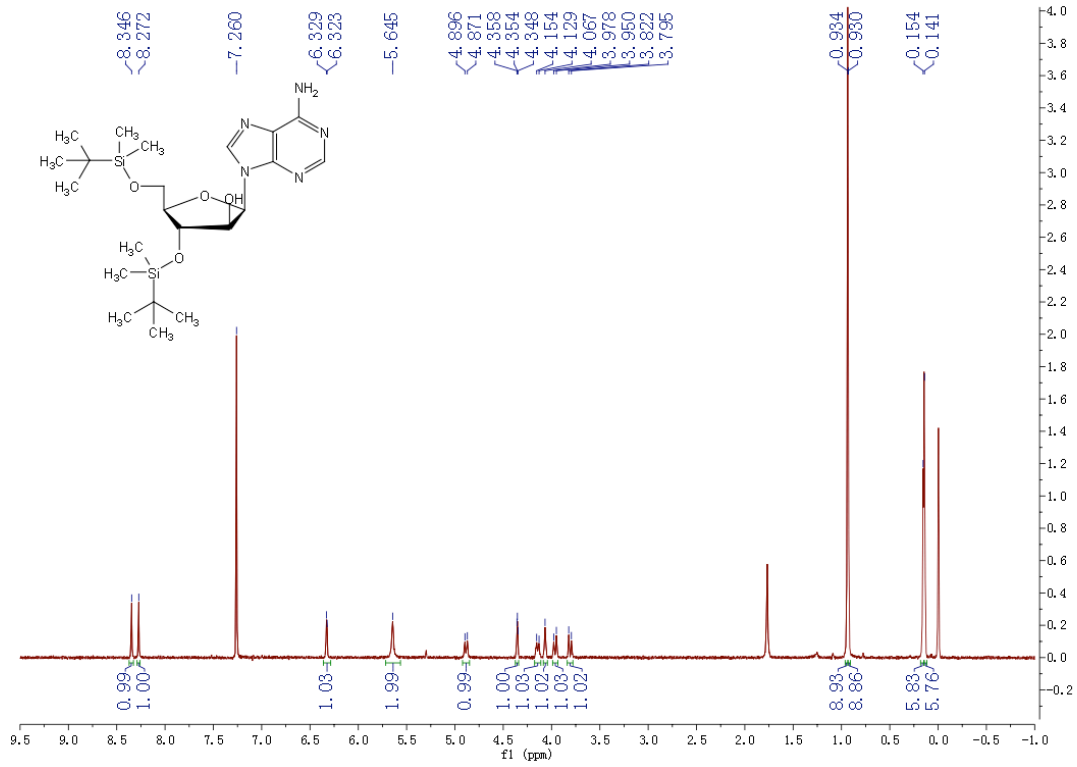

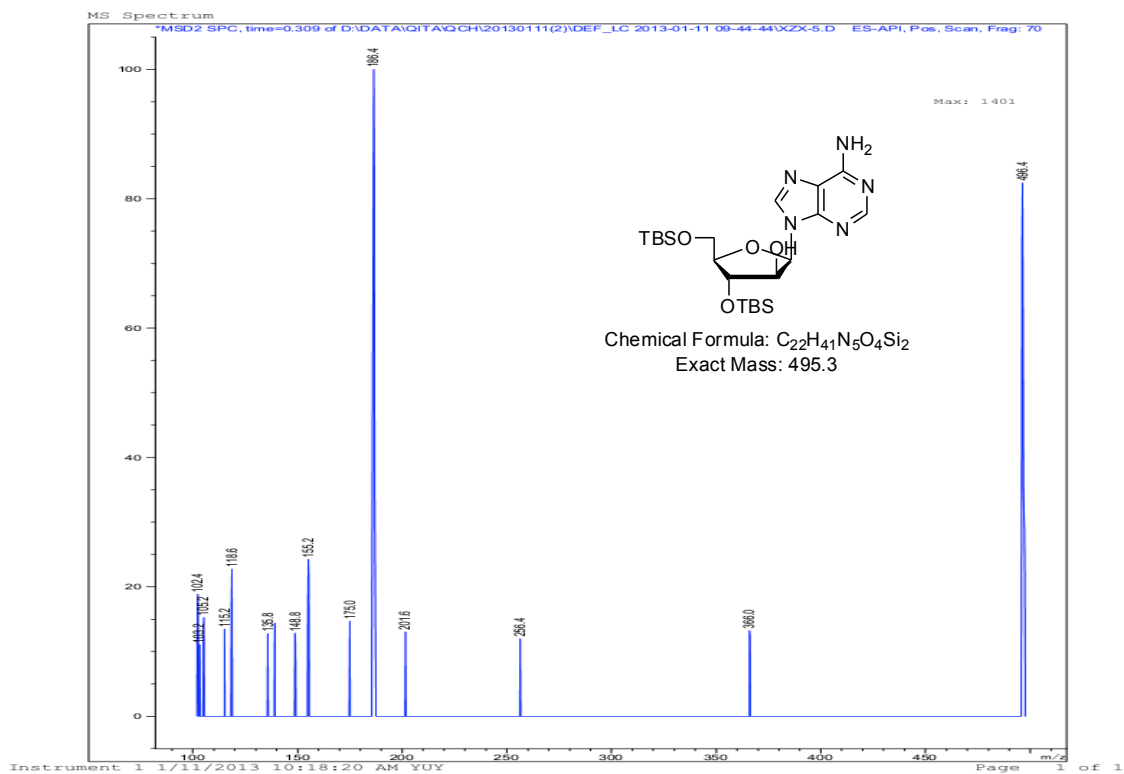

化合物 18( $^1H$  NMR  $^{13}C$  NMR MS)

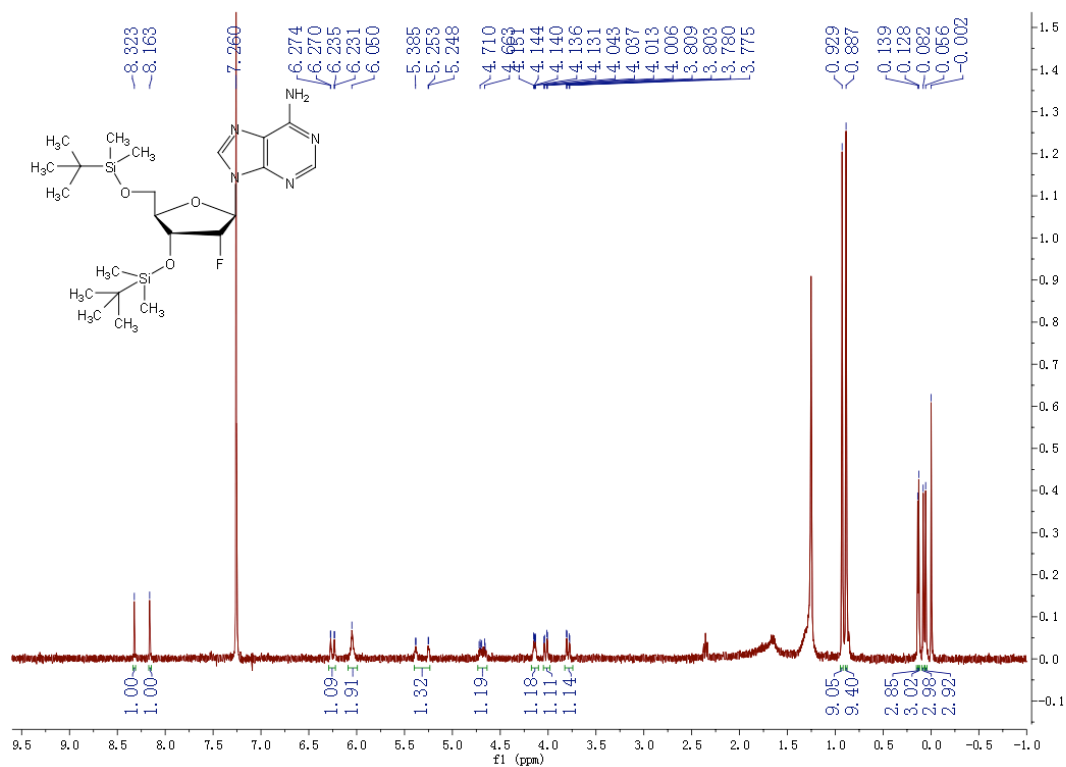

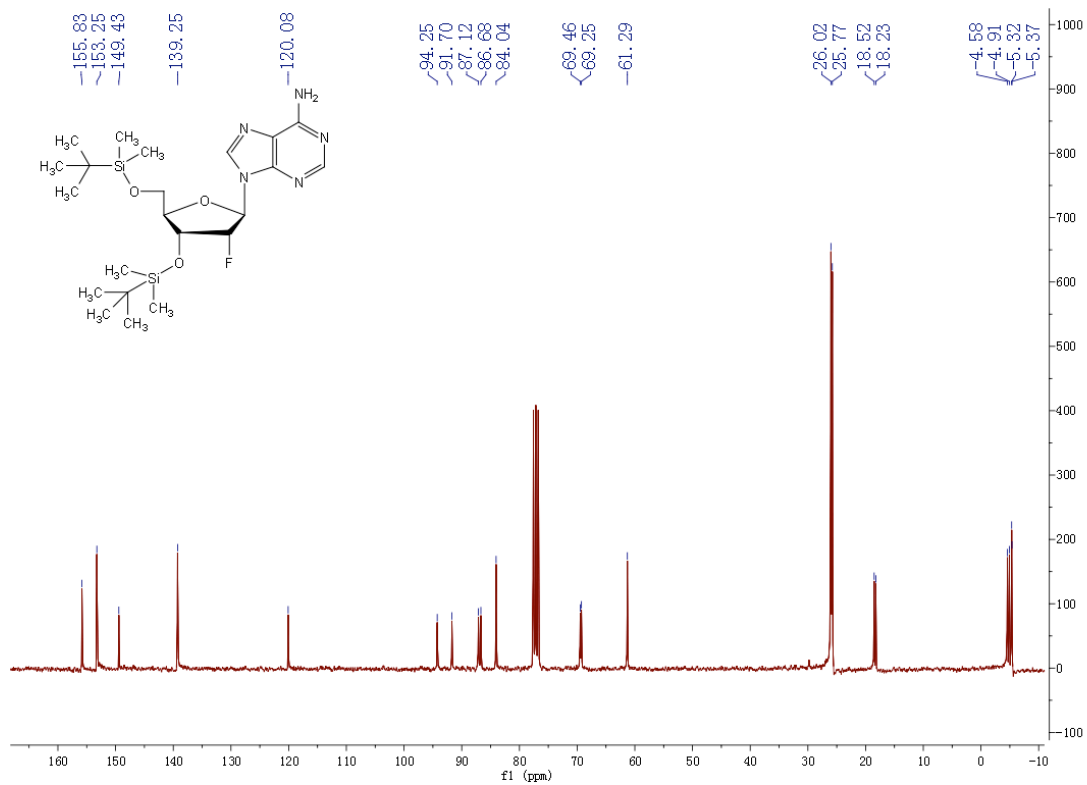

xxx-pos@ms1\_001 #12-119 RT: 0.04-0.41 AV: 108 NL: 1.19E6  
T: FTMS + p ESI Full ms [153.00-2000.00]

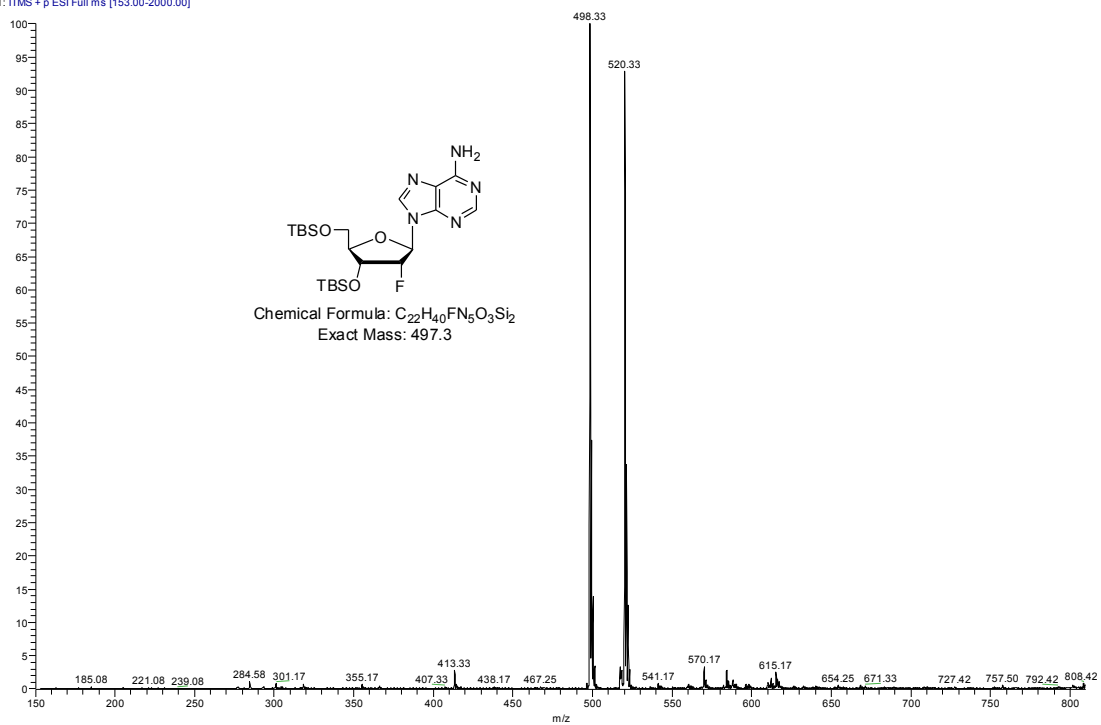

化合物 19 ( $^1\text{H}$  NMR  $^{13}\text{C}$  NMR MS)

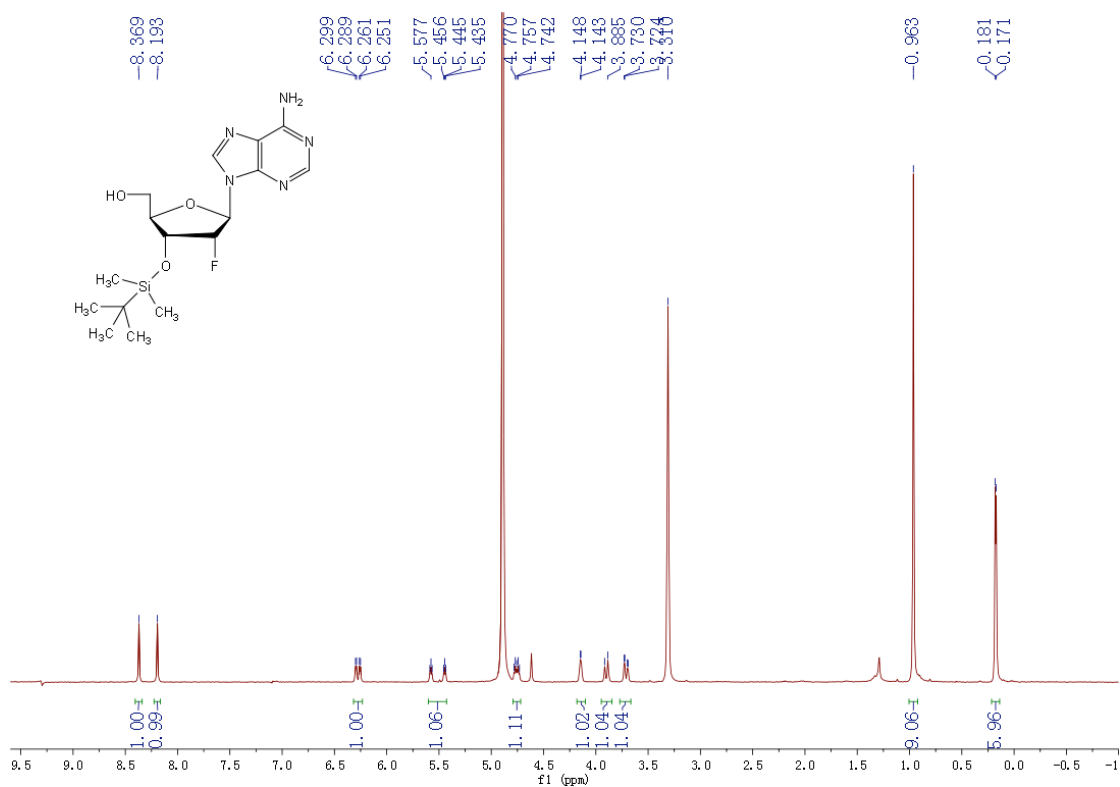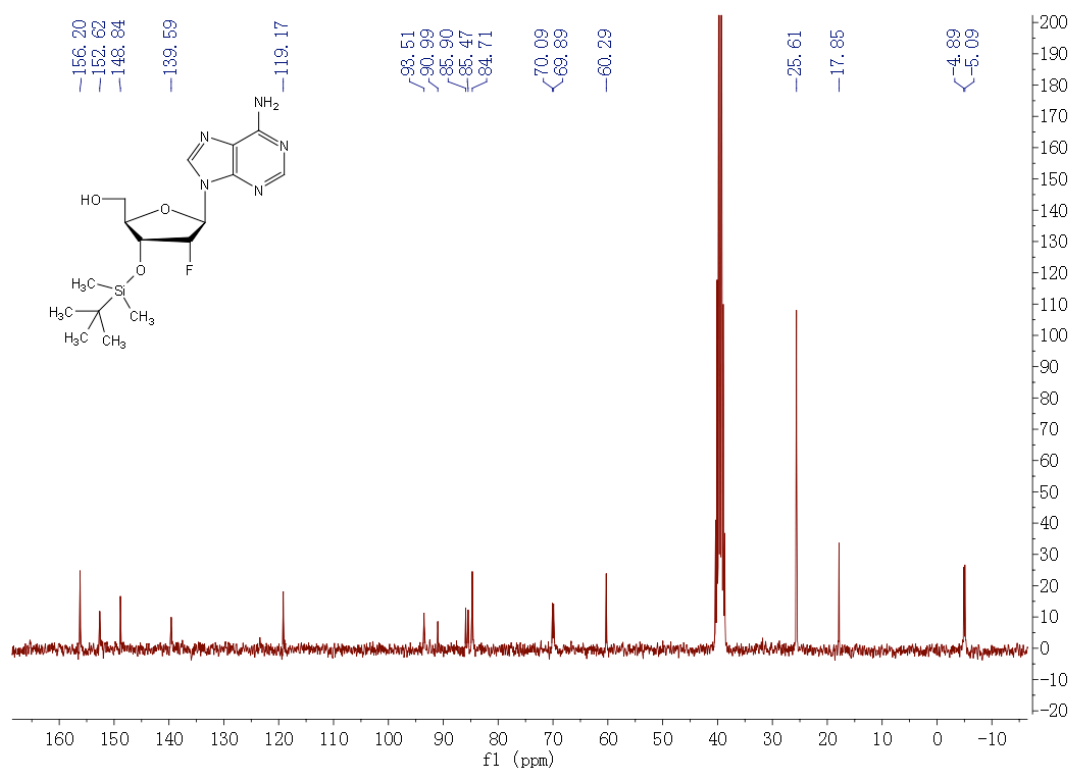

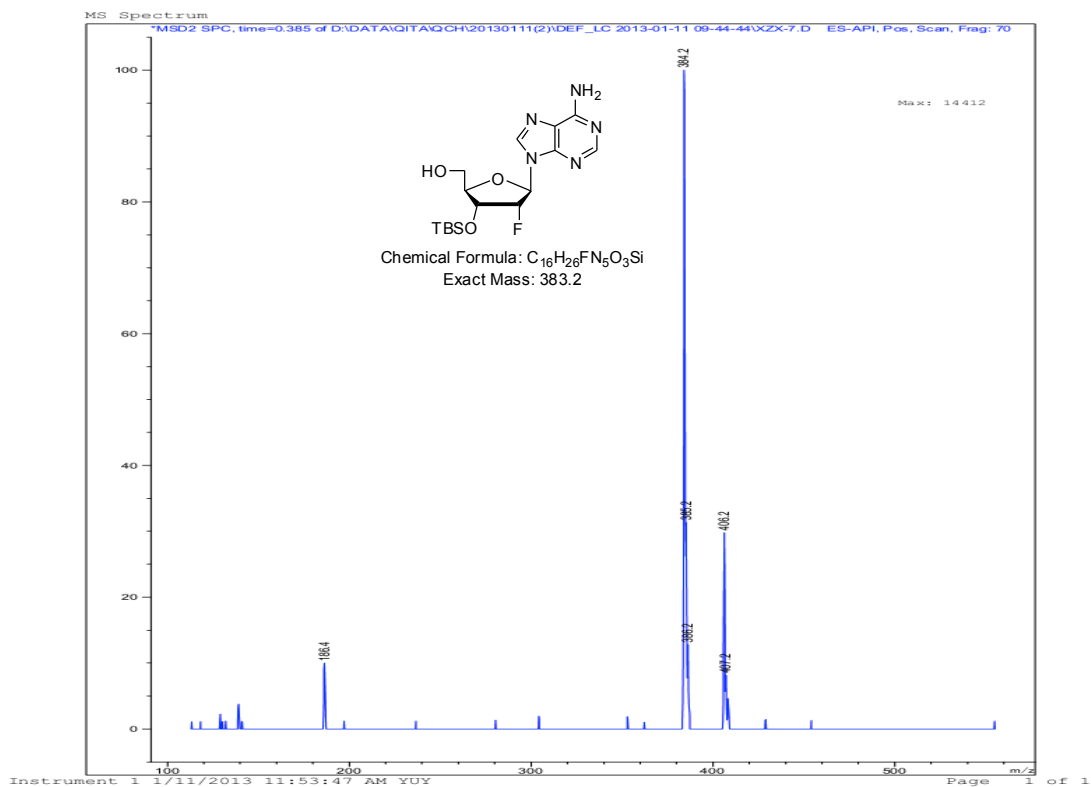

化合物 20( $^1H$  NMR  $^{13}C$  NMR MS)

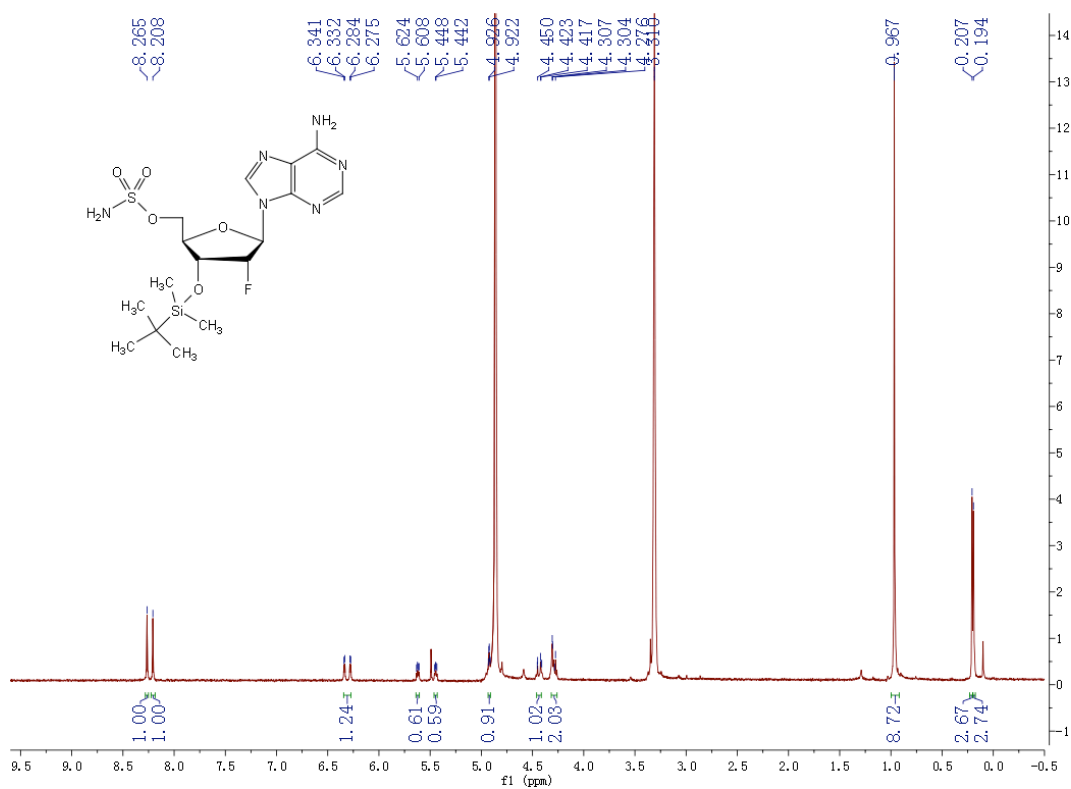

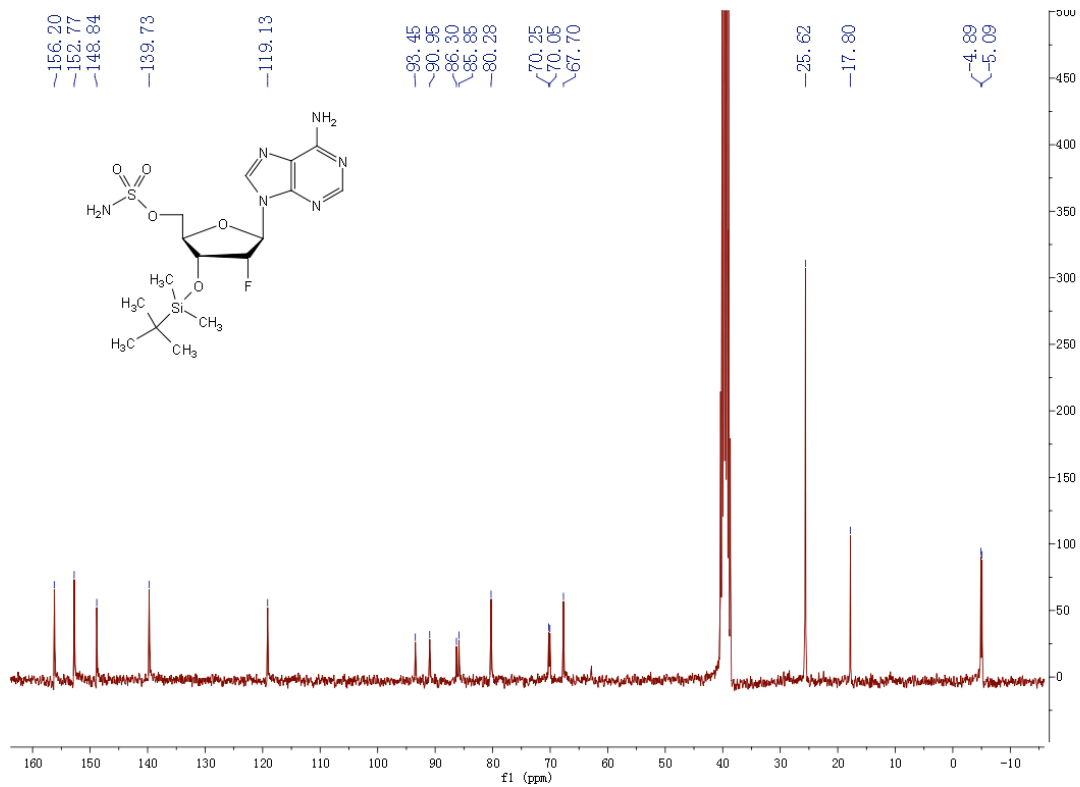

Print of window 80: MS Spectrum

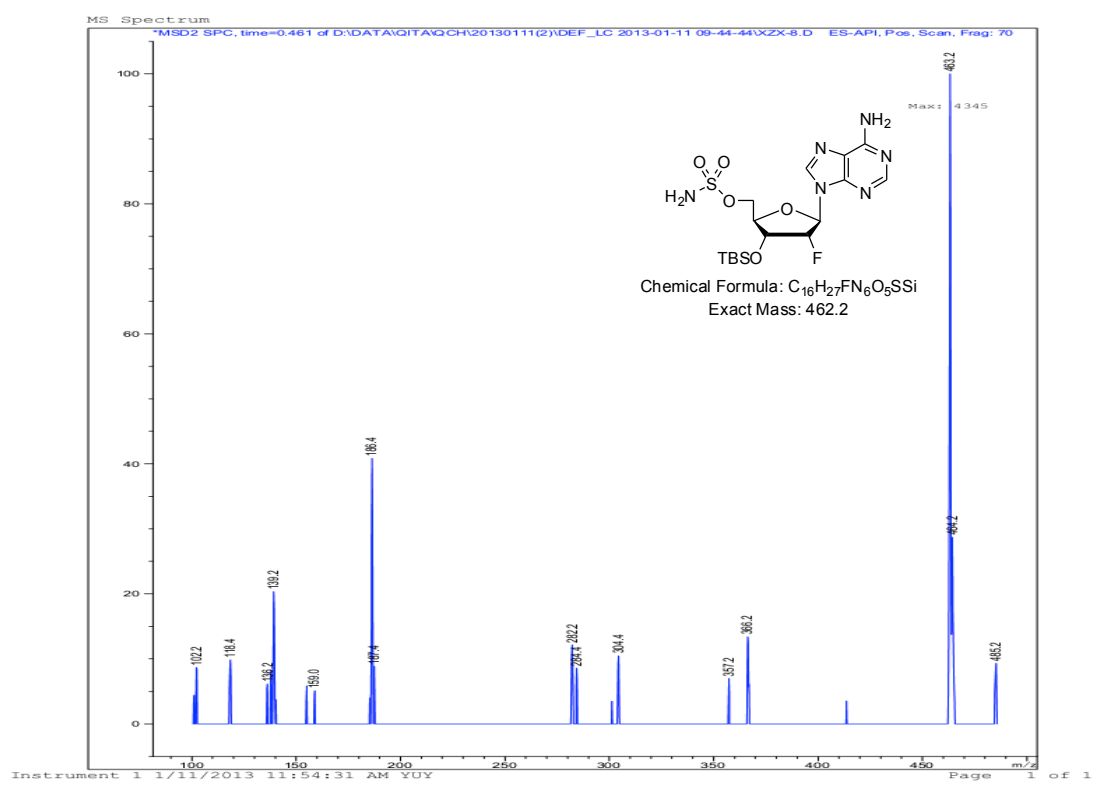

化合物 21(MS)

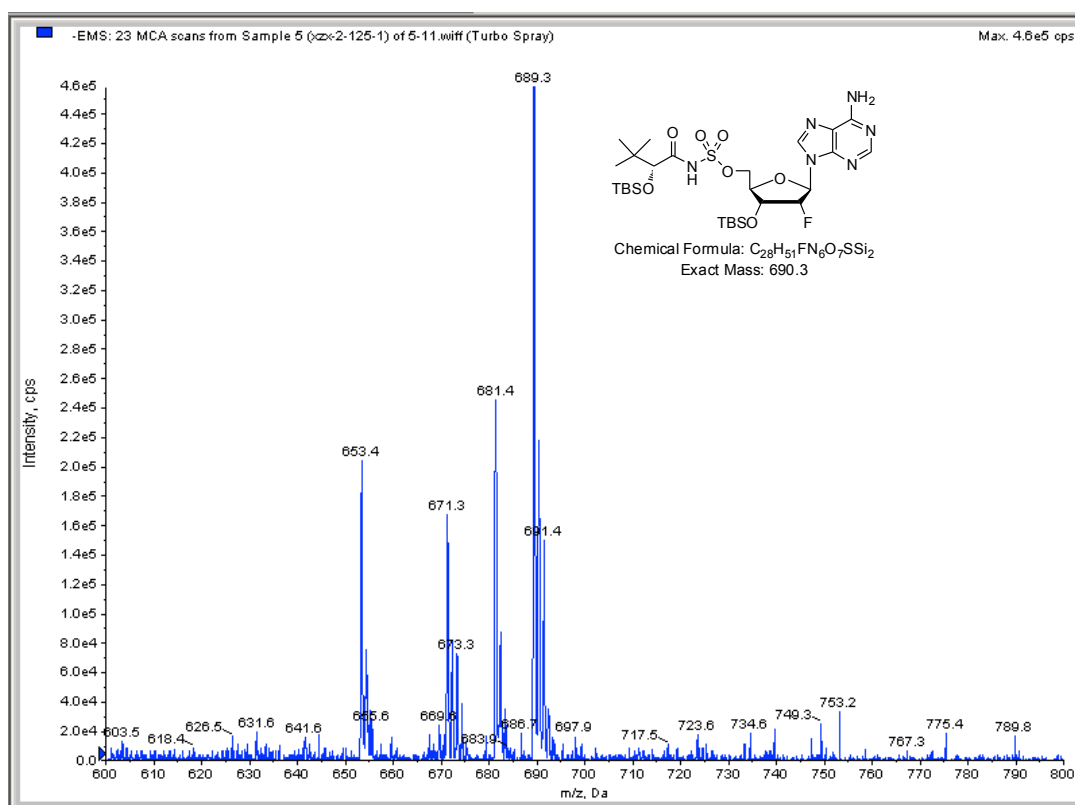

化合物 3 ( $^1H$  NMR  $^{13}C$  NMR MS HRMS)

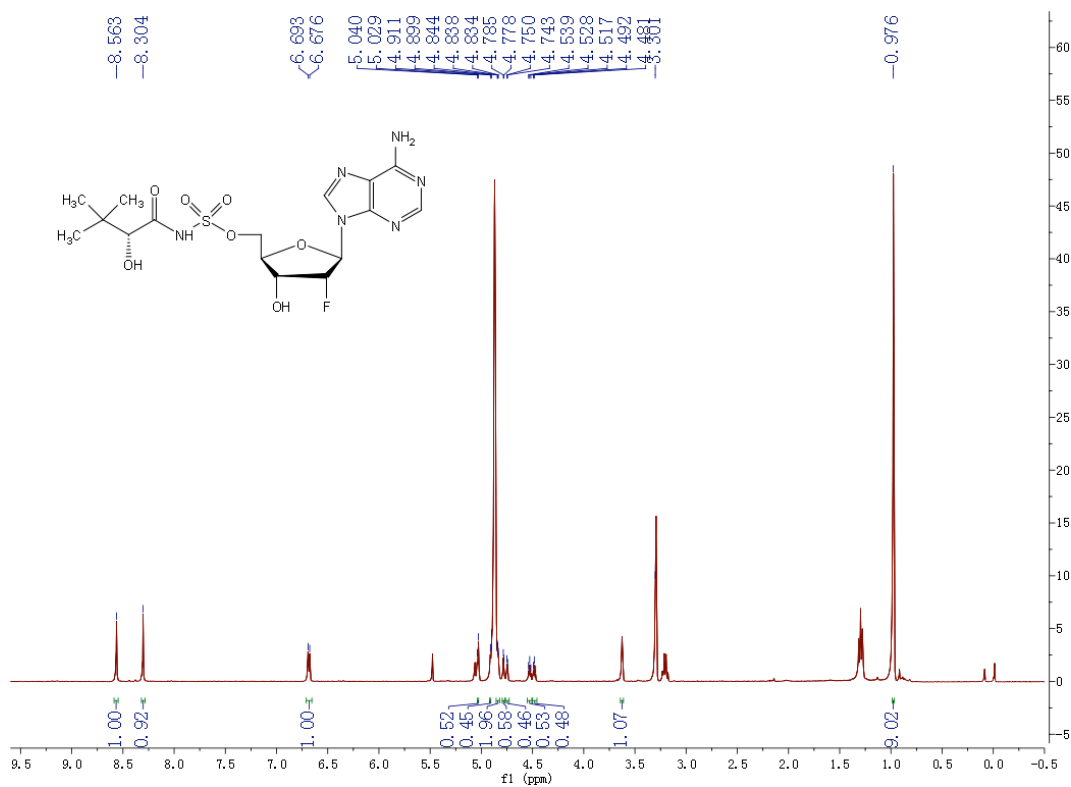



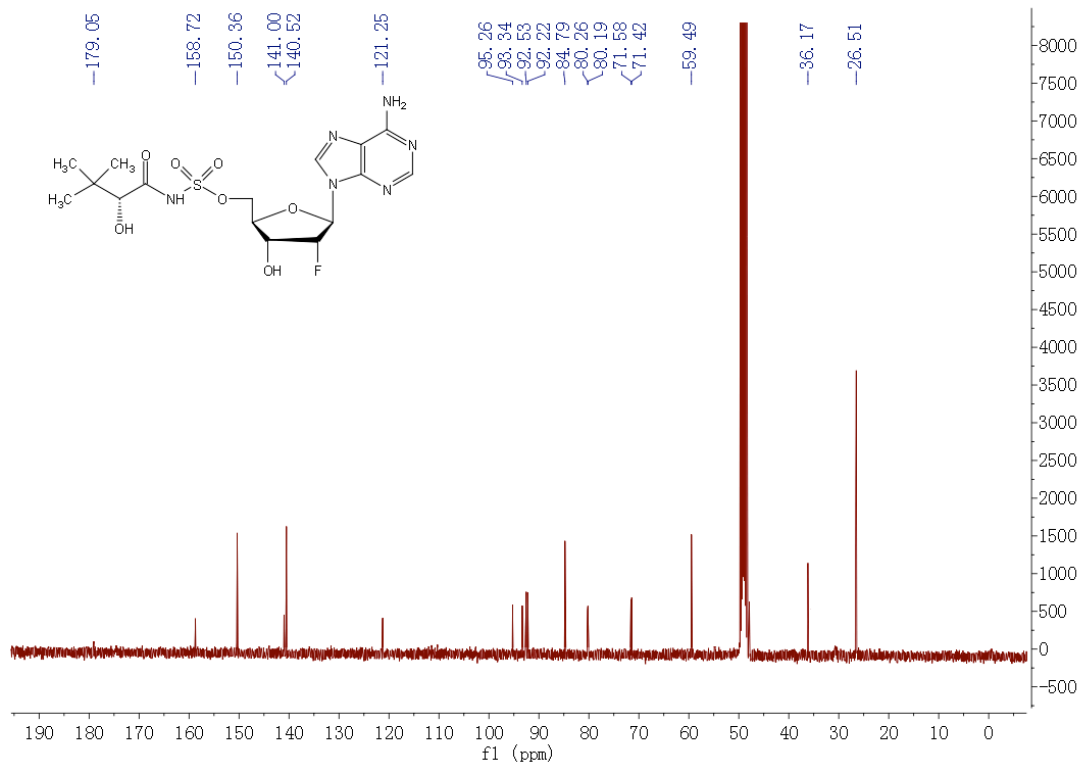

■ -EMS: 9 MCA scans from Sample 3 (kzx-02-150--1) of 6-26.wiff (Turbo Spray)

Max: 1.1e7 cps.

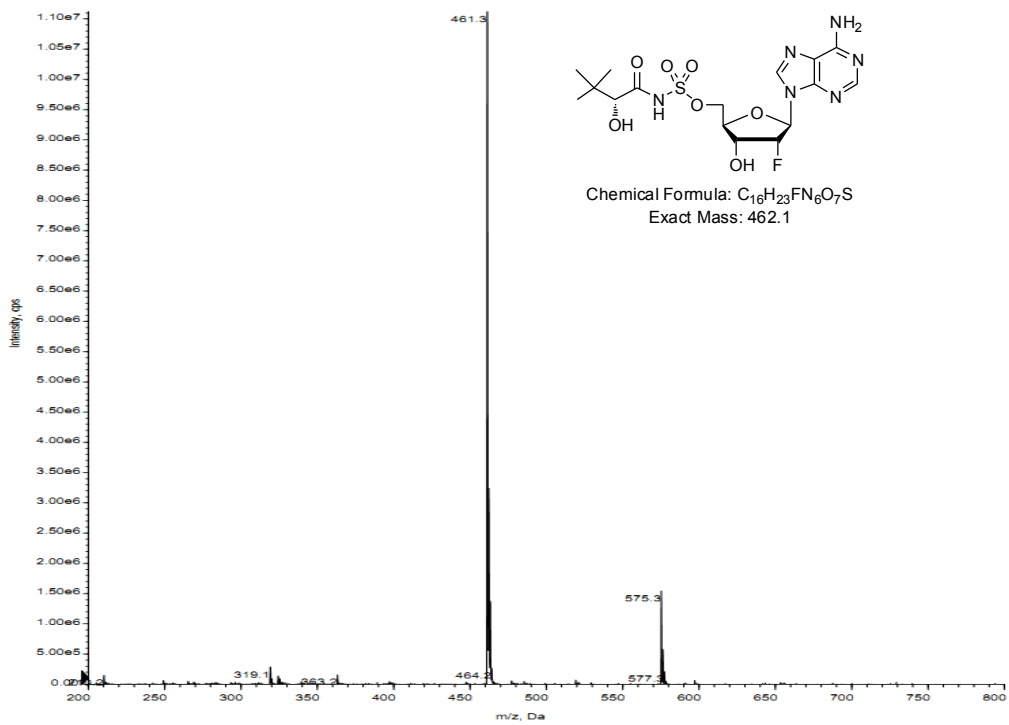

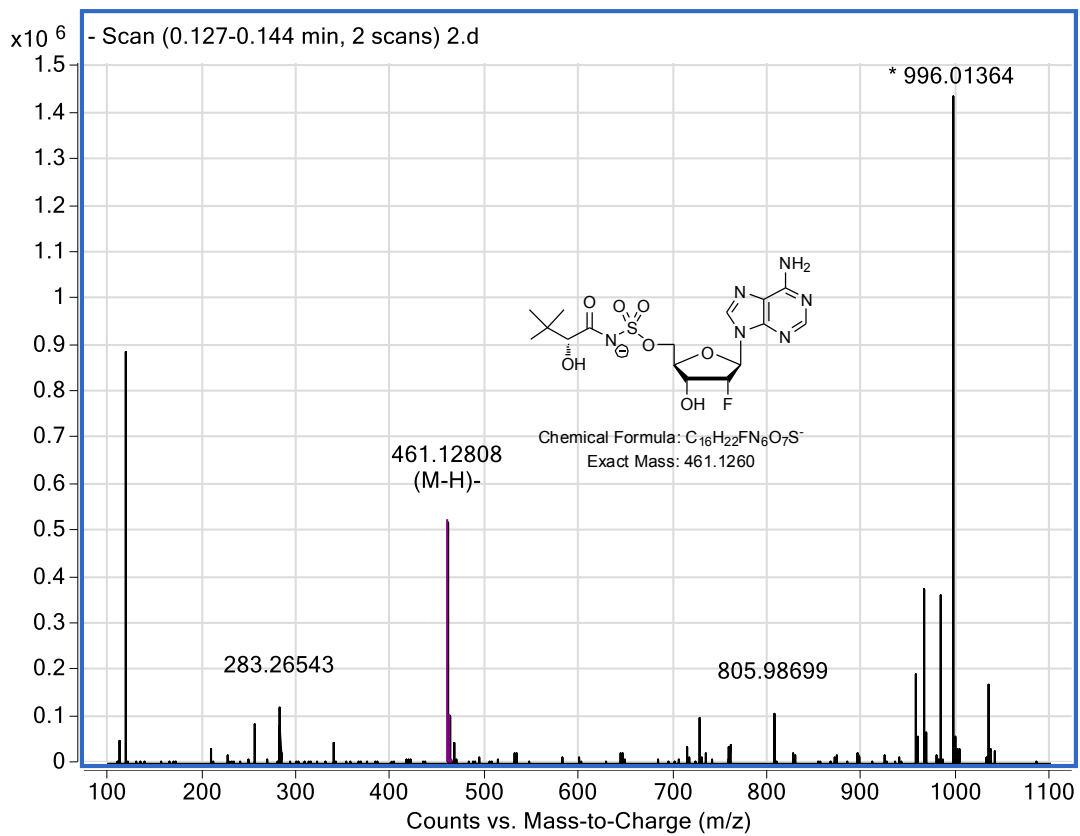

化合物 23 (MS)

Print of window 80: MS Spectrum

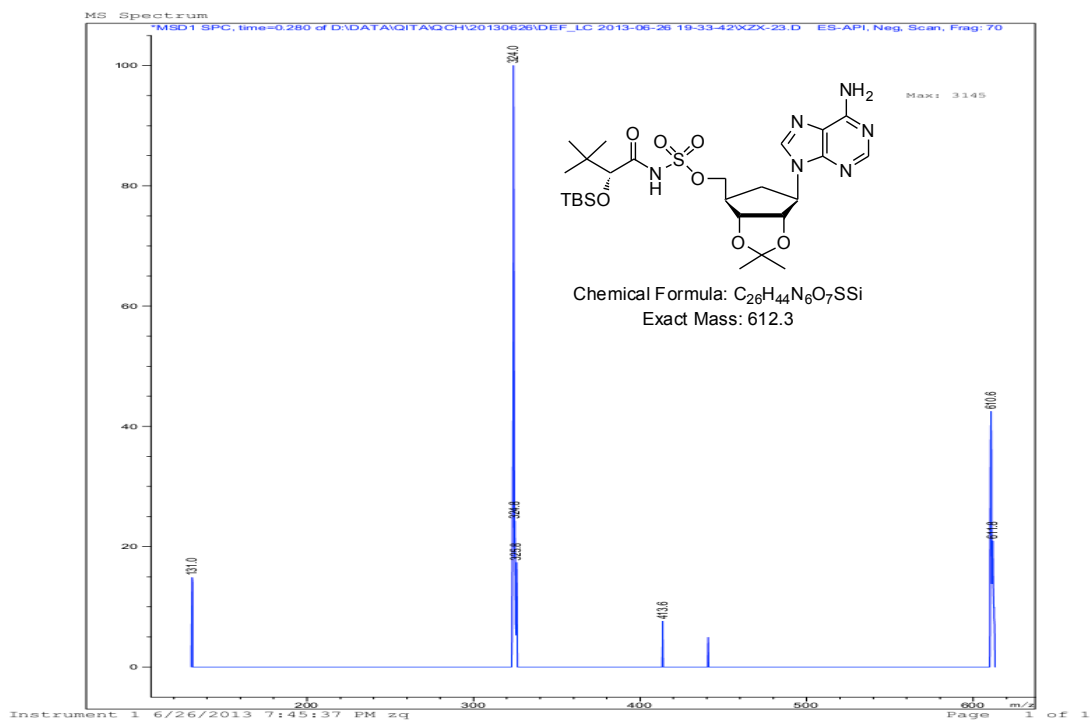

化合物 4 (<sup>1</sup>H NMR <sup>13</sup>C NMR MS)

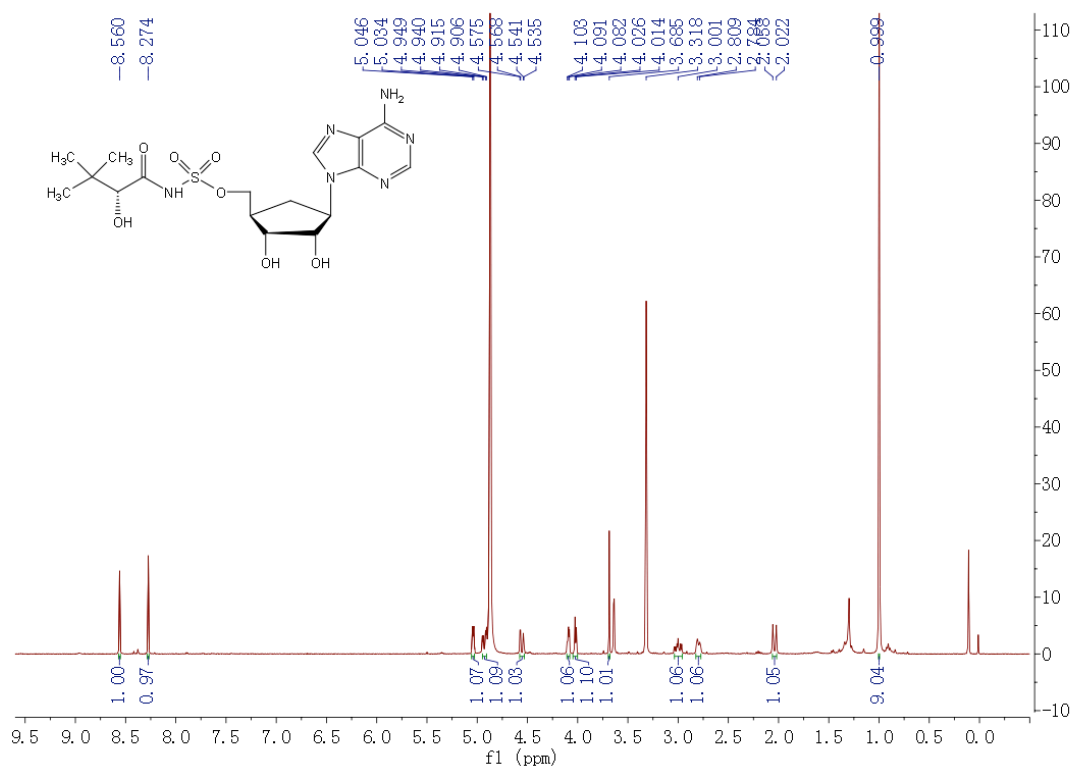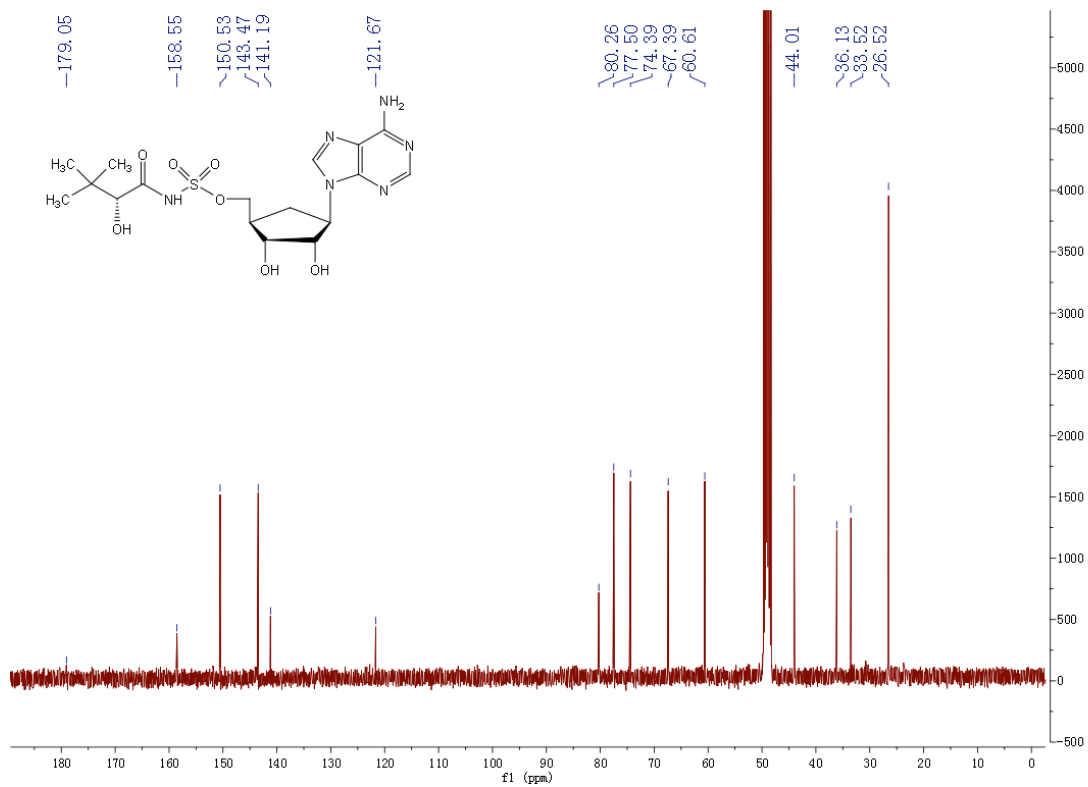

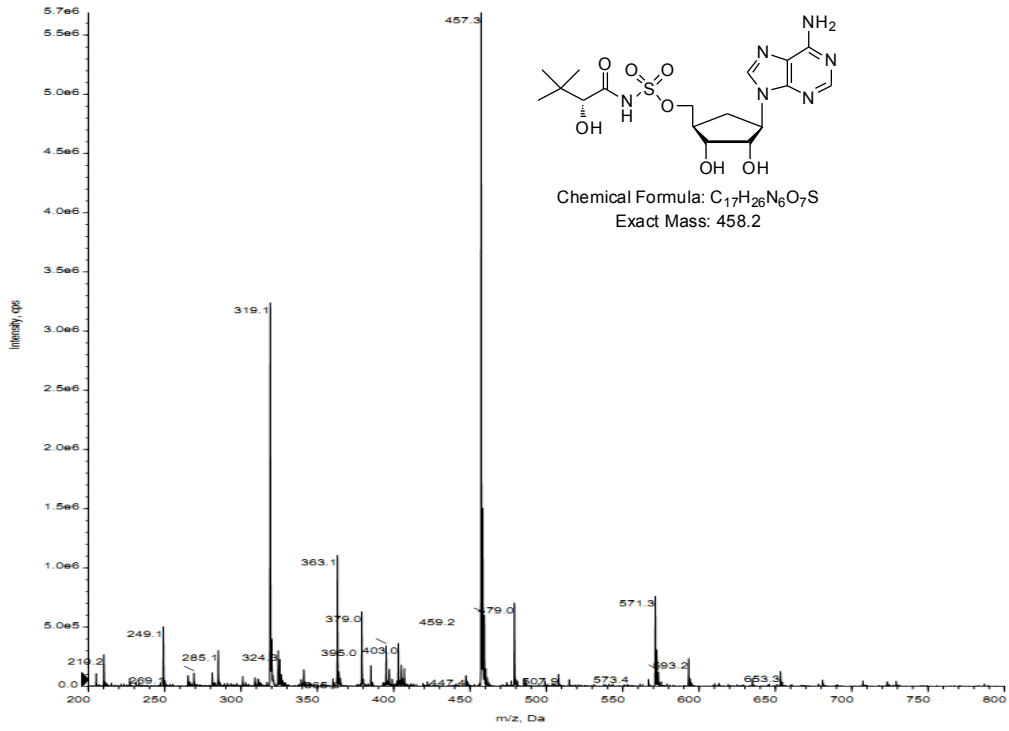

化合物 26 ( $^1H$  NMR  $^{13}C$  NMR MS)

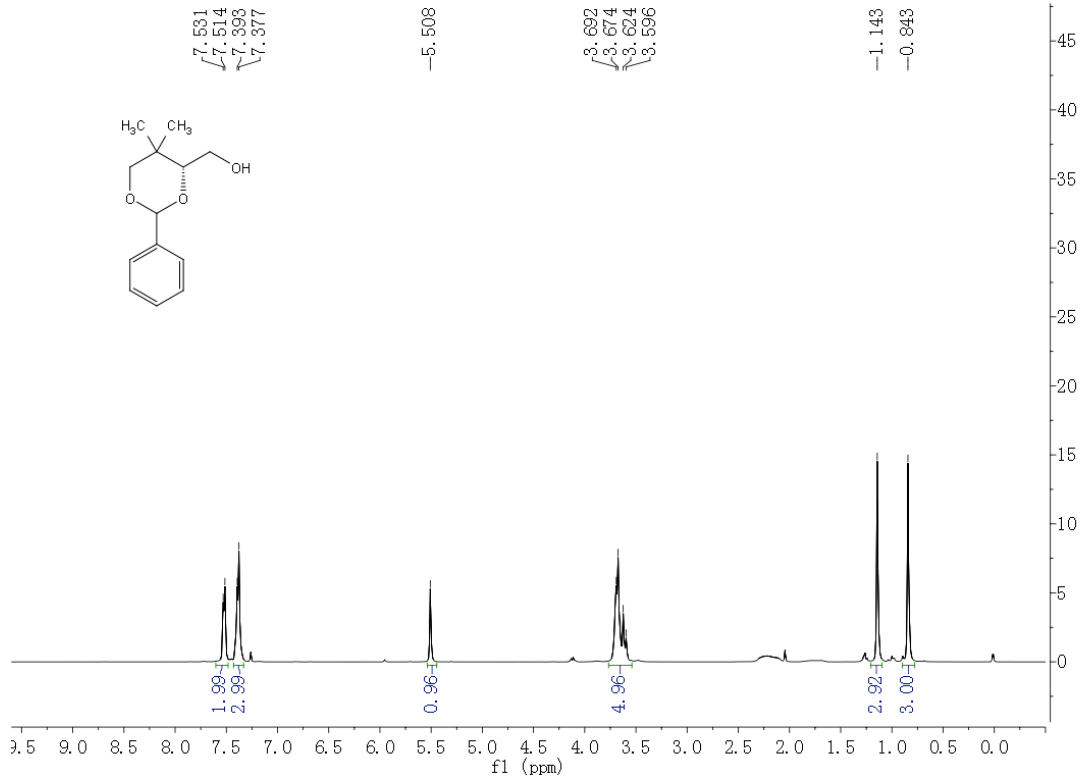

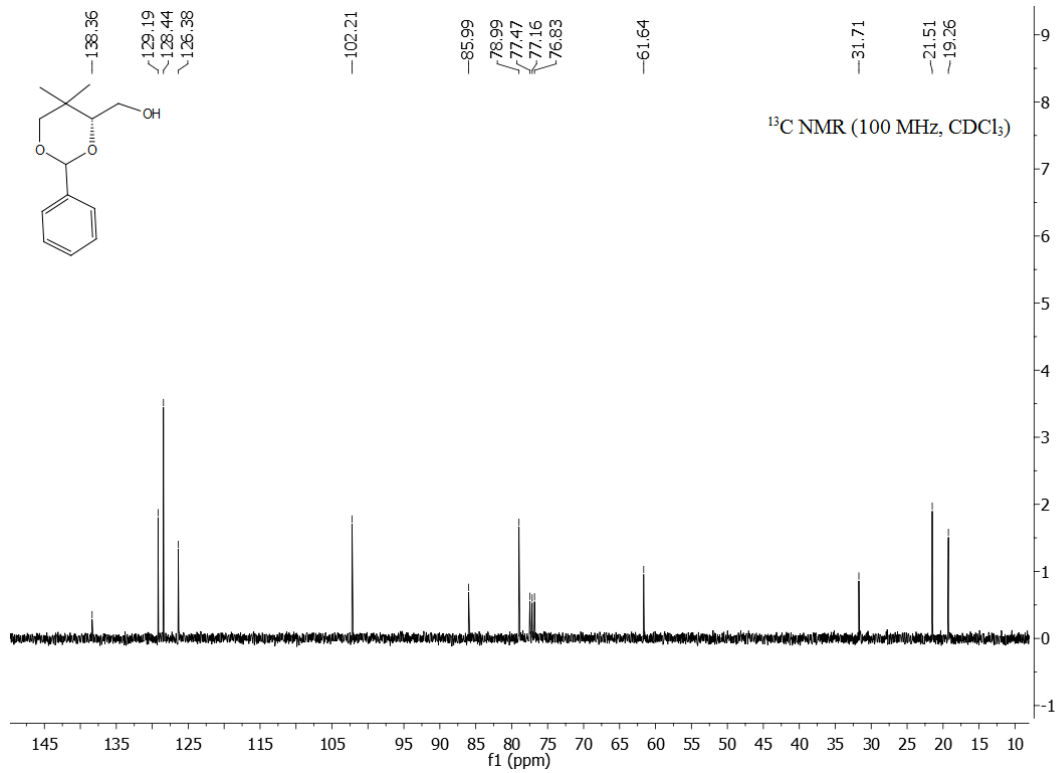

Print of window 80: MS Spectrum

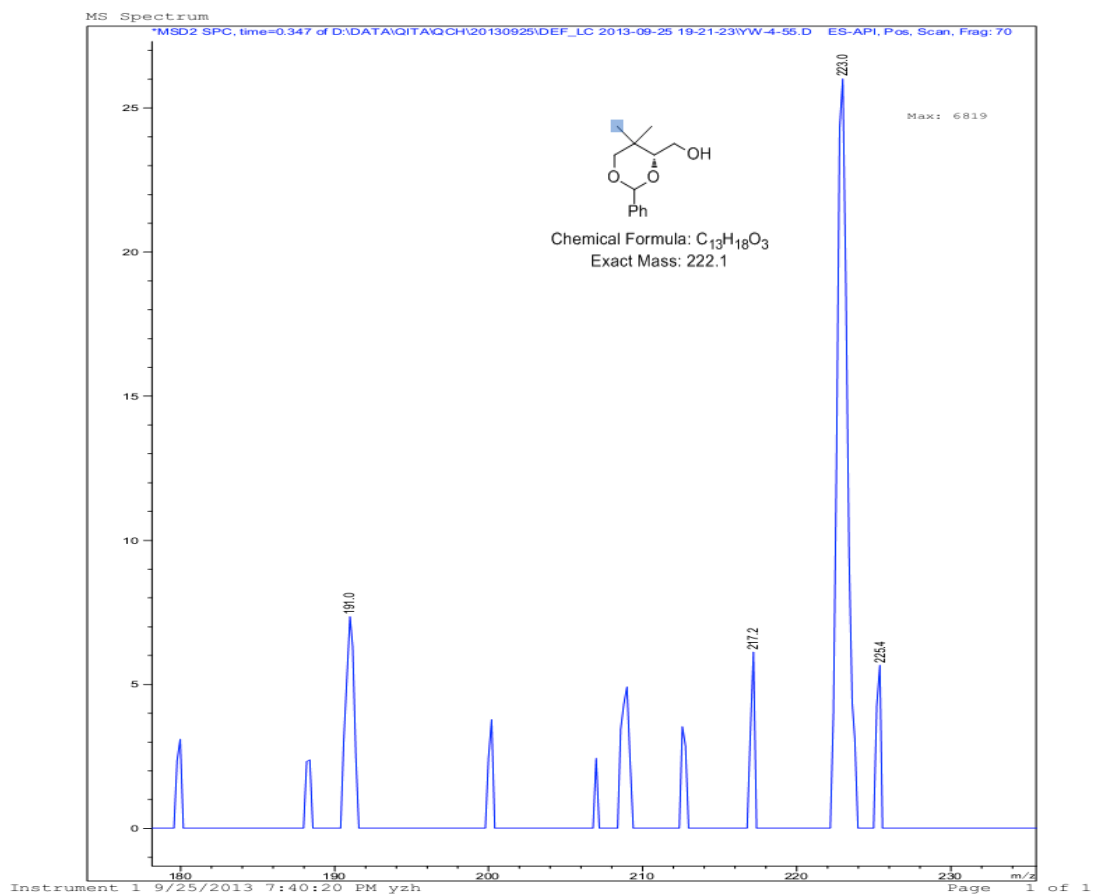

化合物 27 (<sup>1</sup>H NMR <sup>13</sup>C NMR MS)

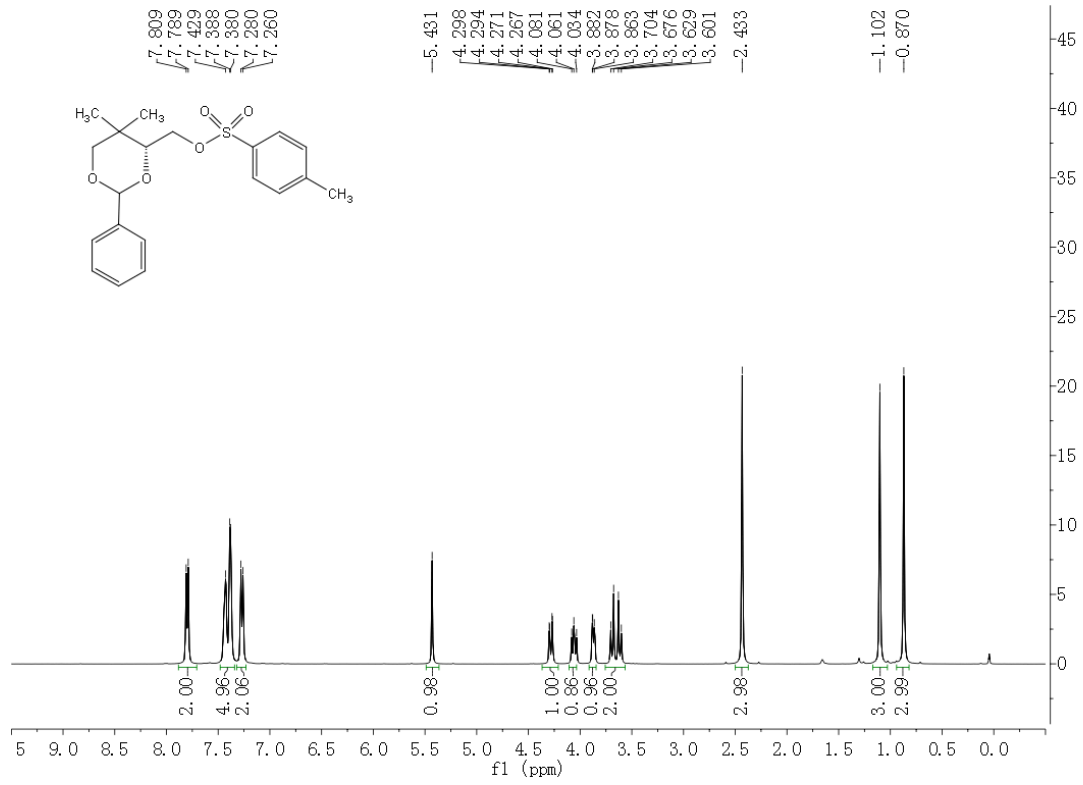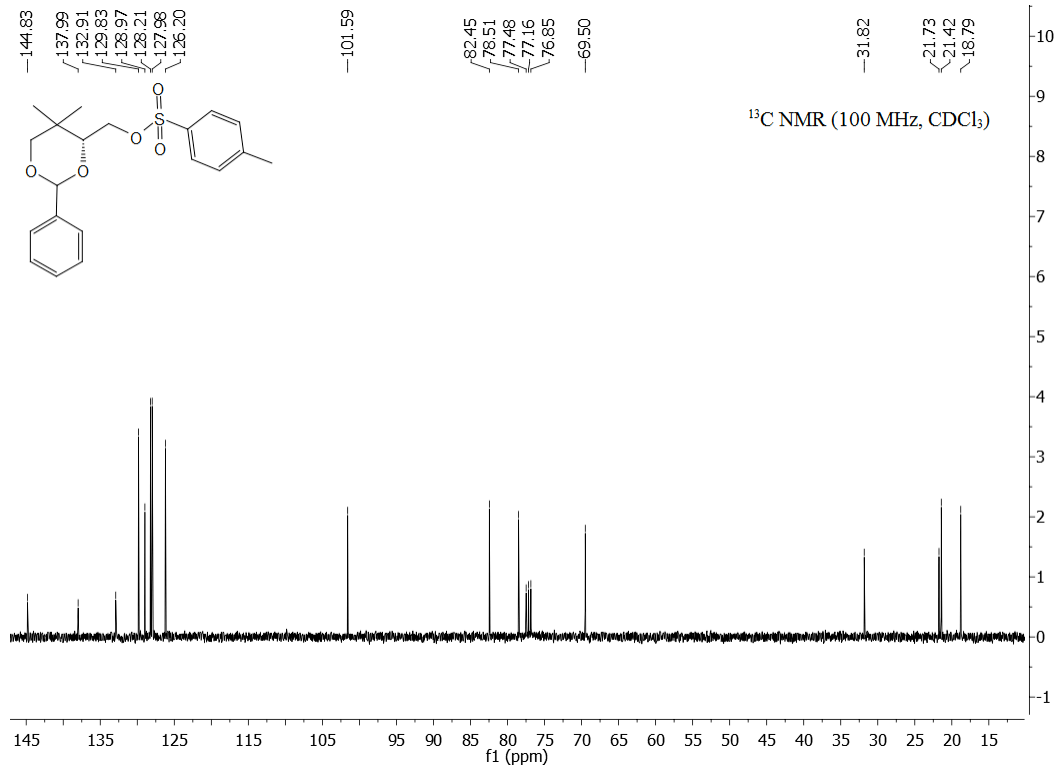

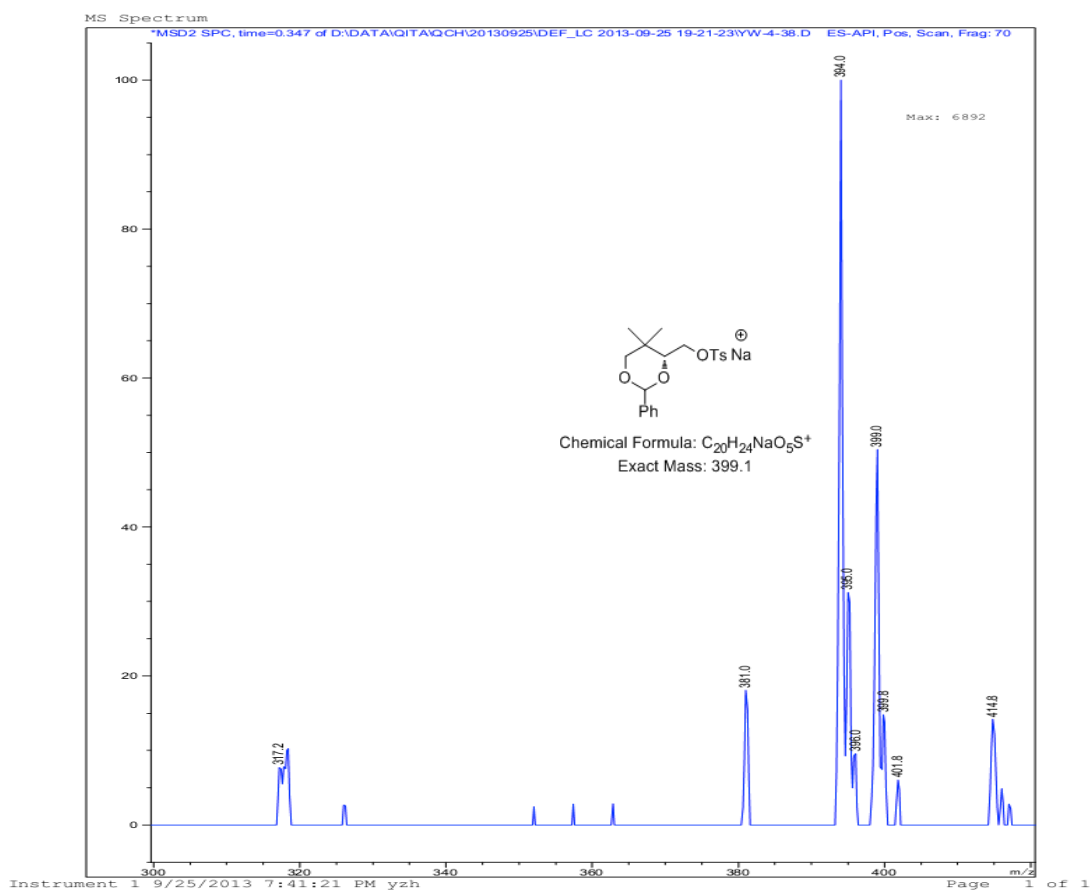

化合物 28 ( $^1H$  NMR,  $^{13}C$  NMR)

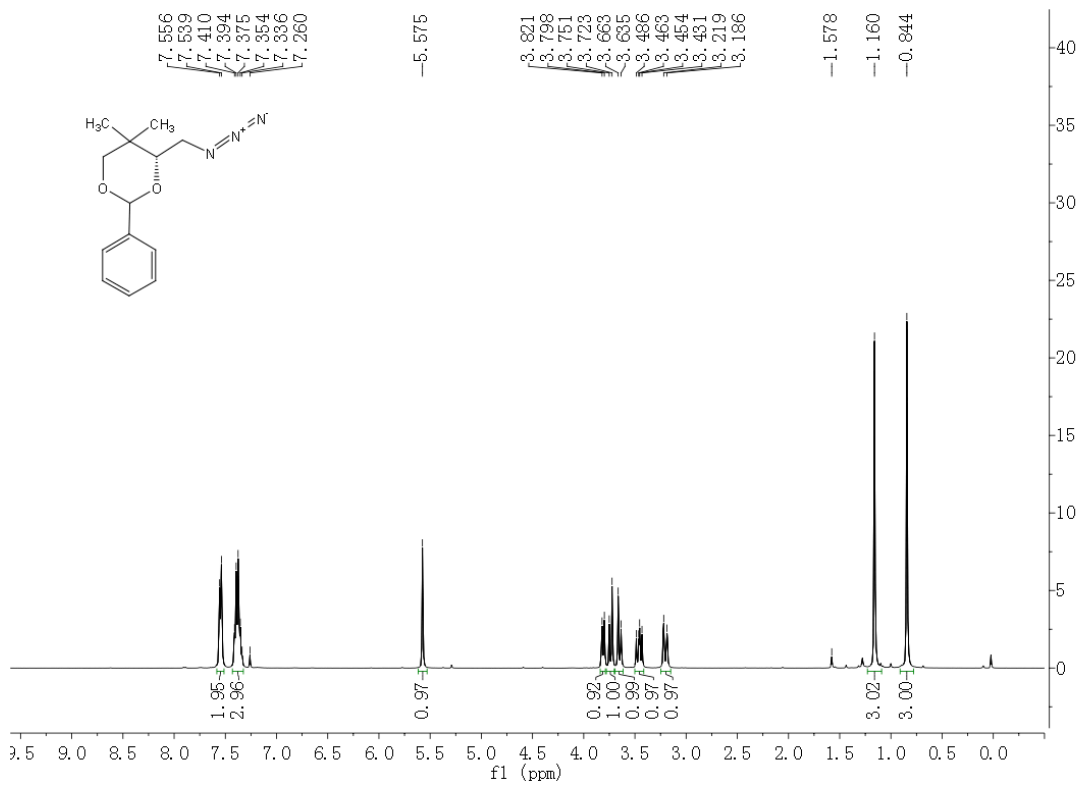

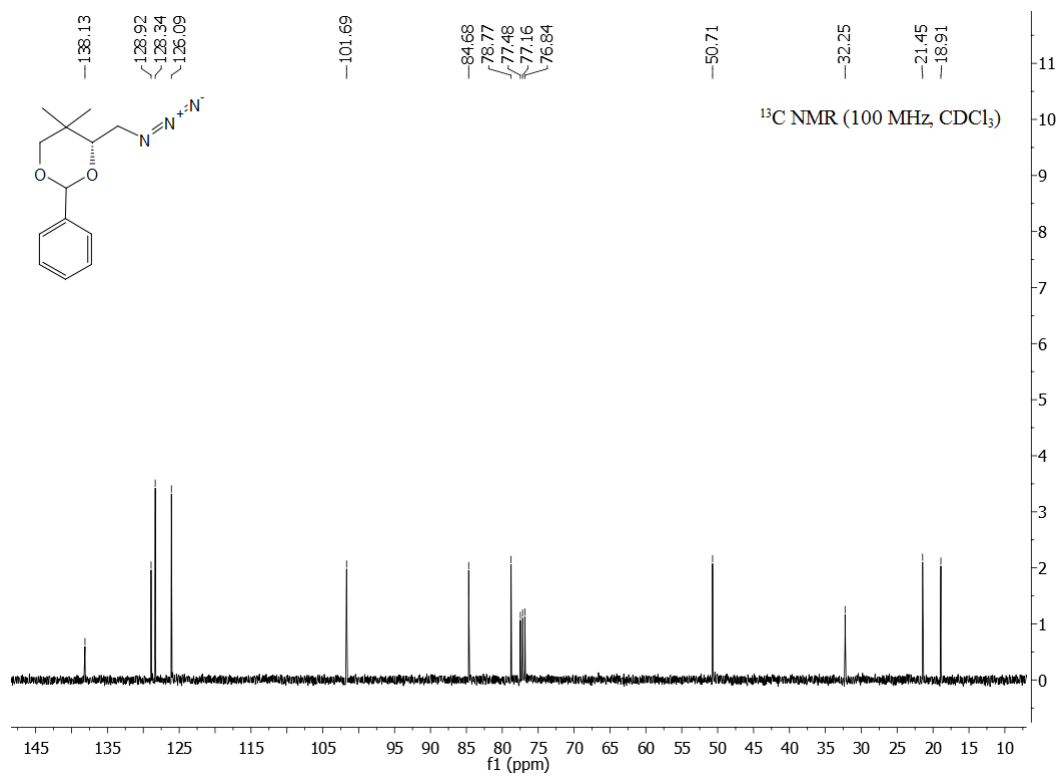

化合物 29 (<sup>1</sup>H NMR, <sup>13</sup>C NMR)

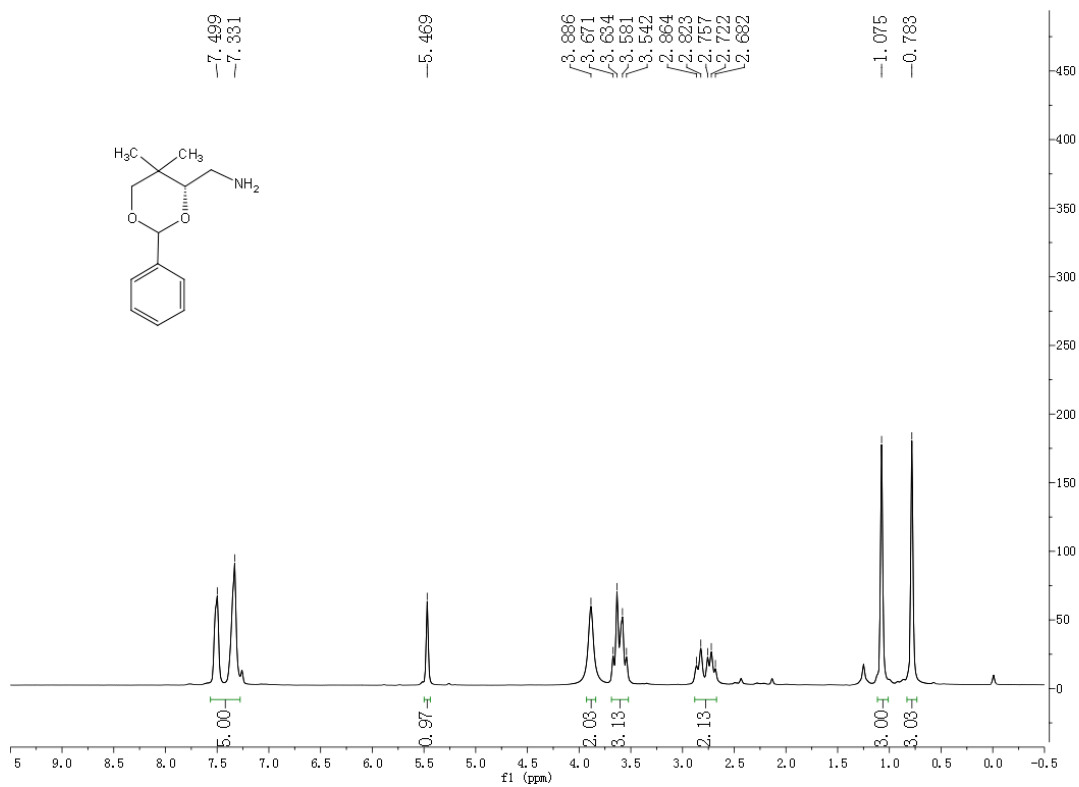



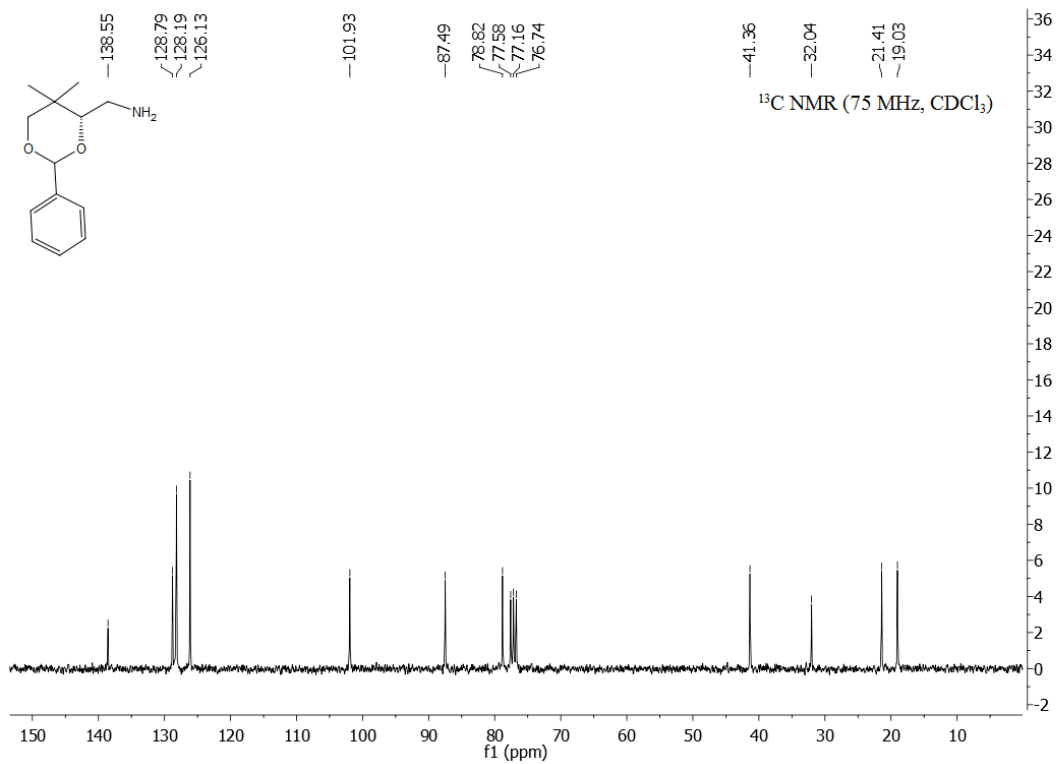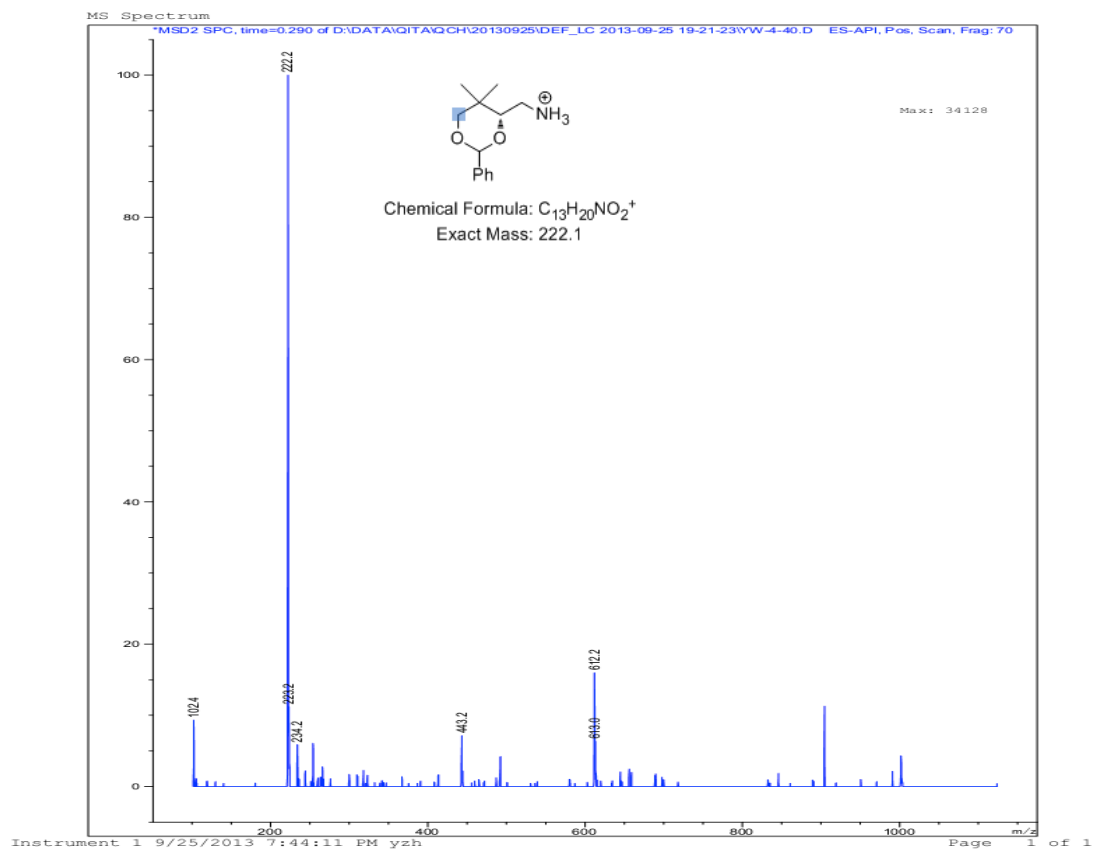

化合物 30 ( $^1\text{H}$  NMR,  $^{13}\text{C}$  NMR)

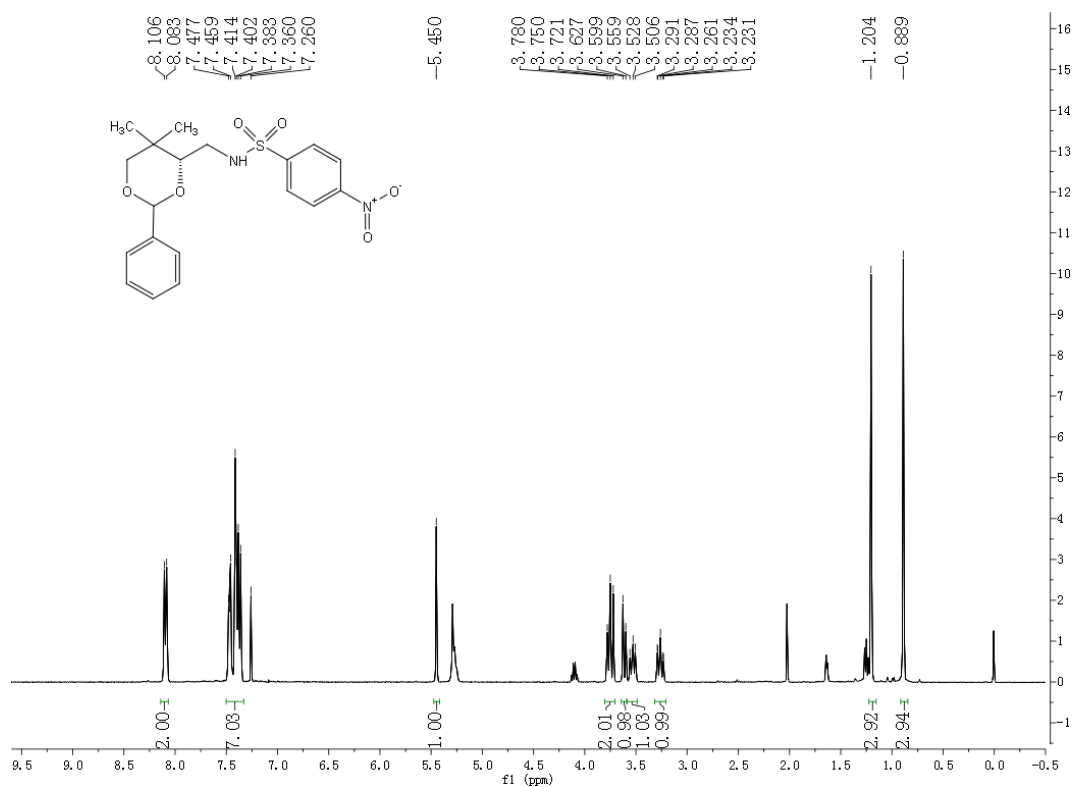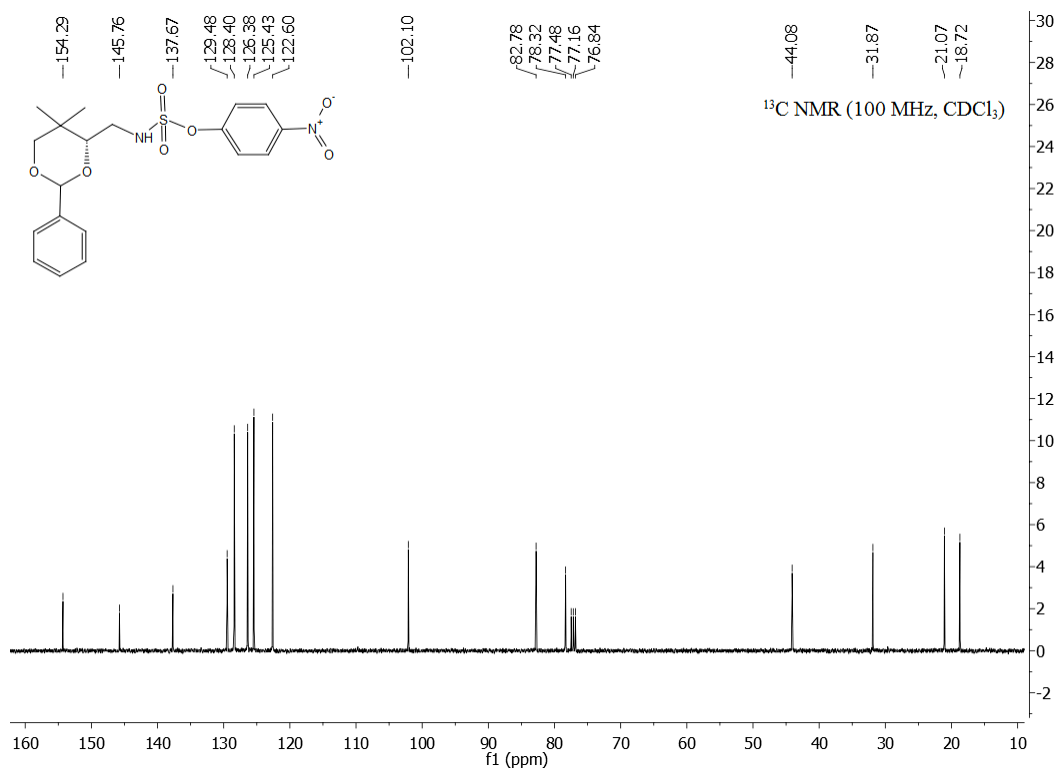

Print of window 80: MS Spectrum

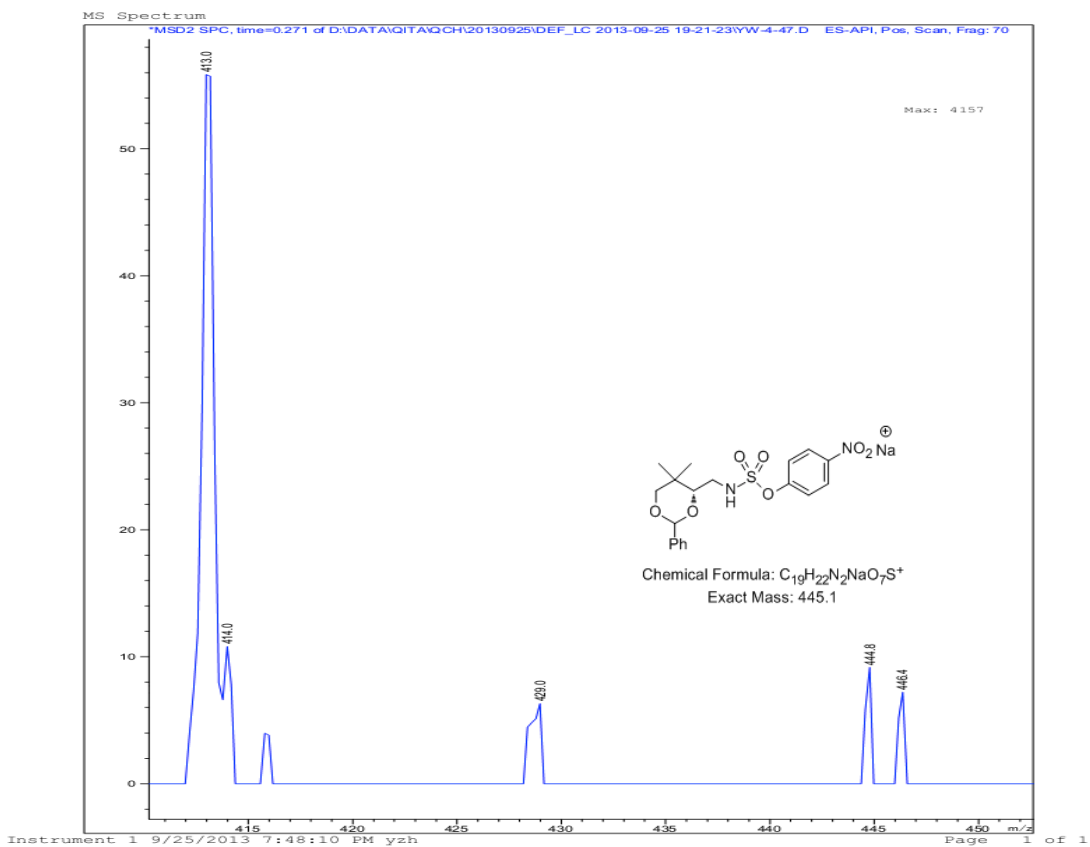

化合物 32 (MS)

Print of window 80: MS Spectrum

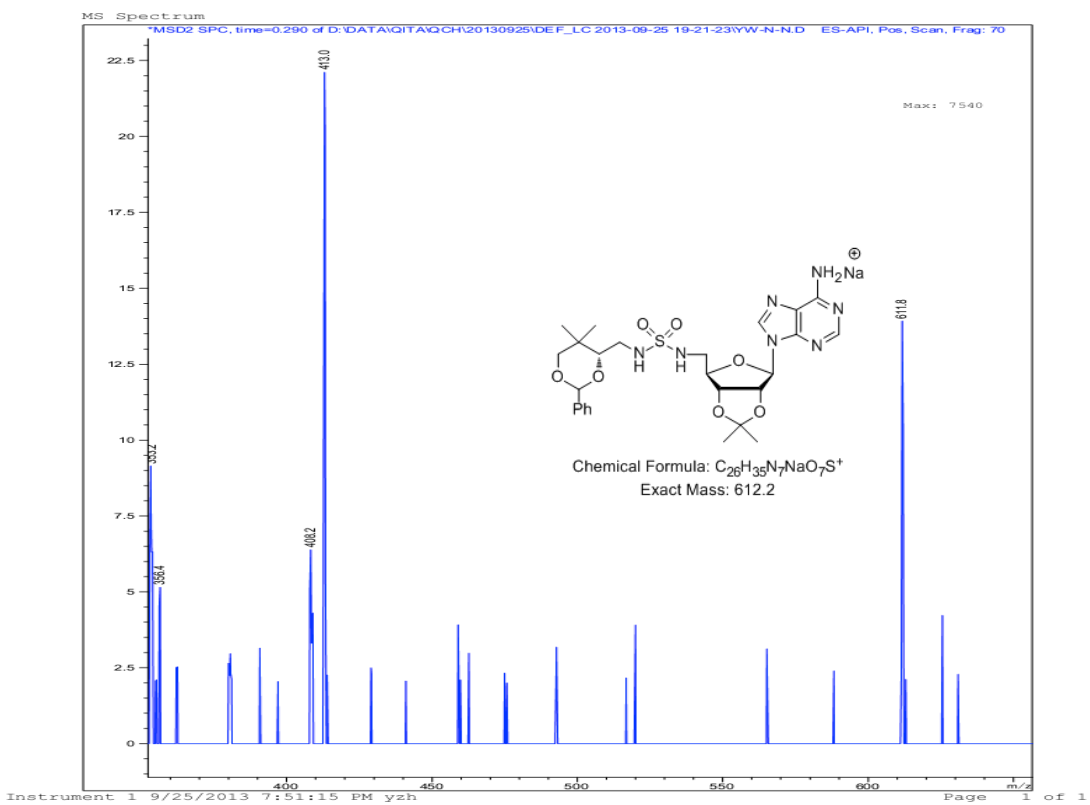

化合物 5 ( $^1\text{H}$  NMR  $^{13}\text{C}$  NMR HRMS)

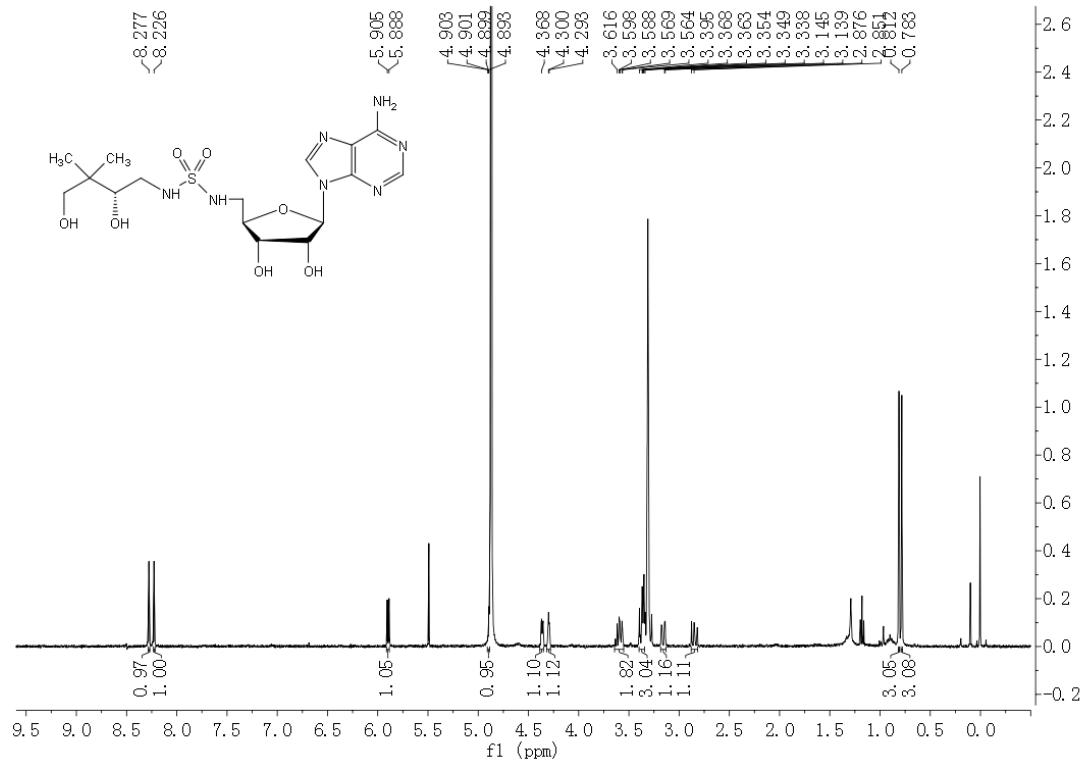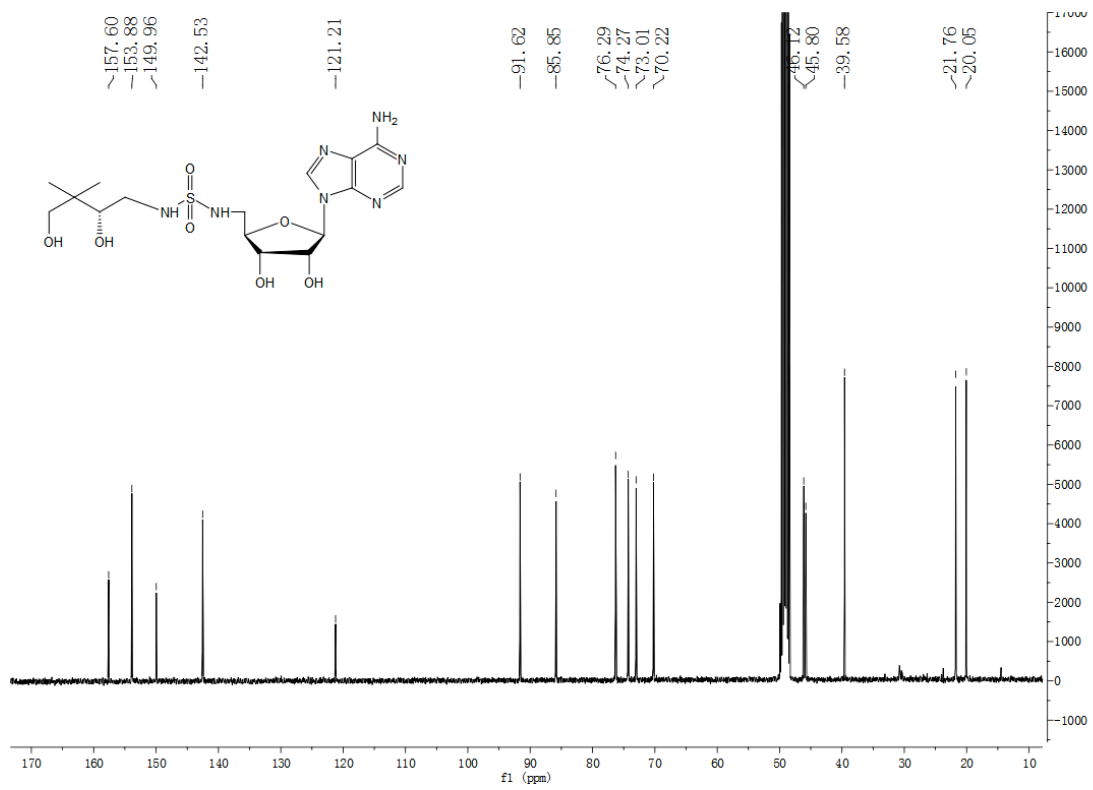

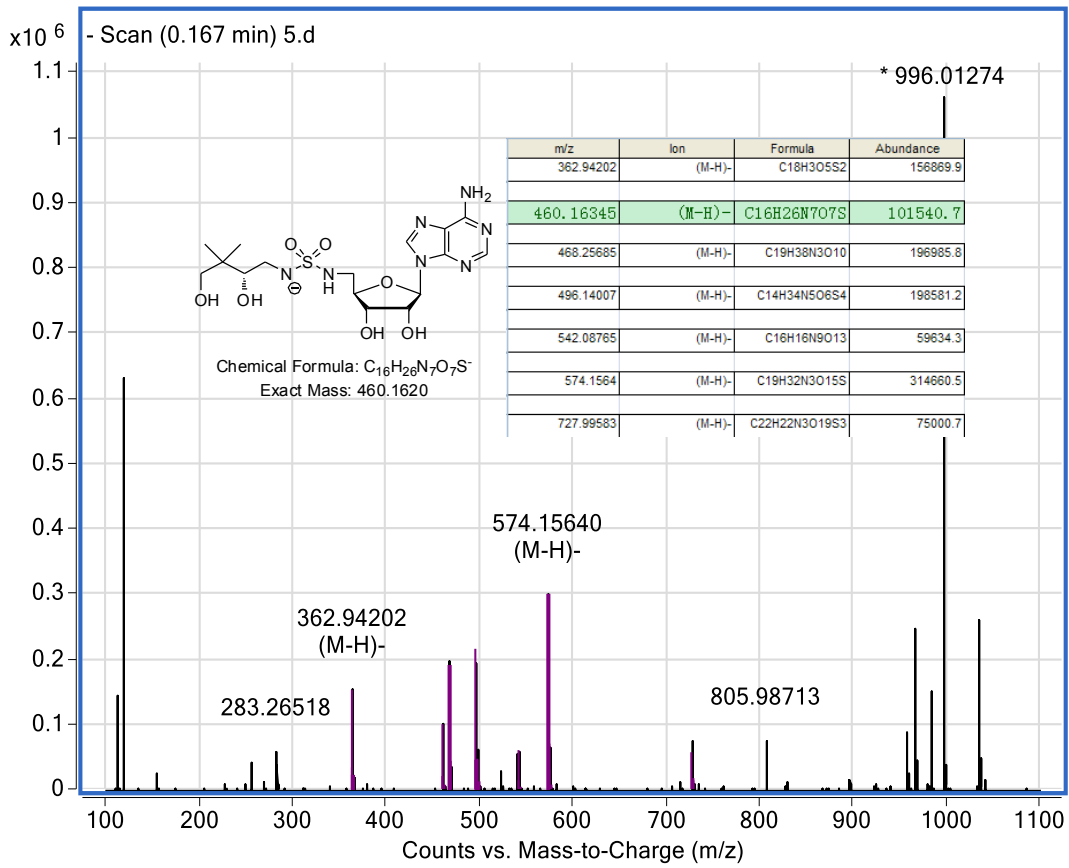

Supplement: NIHMS740682-supplement-SI.pdf [file NIHMS740682-supplement-SI.pdf]
